# Supplementary material for: Flavonoid Biosynthesis Genes in Triticum aestivum L.: Methylation Patterns in Cis-Regulatory Regions of the Duplicated CHI and F3H Genes
Source: MDPI journal article supplement (doi:10.3390/biom12050689), 2022-05-11
Supplement: s1 [file s1]

# Supplementary Material

## 1. Section S1: The alignment of *TaCHI* promoters

```
1
TaCHI-A1 AAAAGAATTGCCAGTTAAGCACAAGATAATTCCAAAAGGTTGTGATTTTACTCGTAGTACAAACAATTGGAGCTTTTCCACACCCACAAAGGTGATTTC
TaCHI-D1 GGAGCTTTTCCACACCCATAAAGGTGGTTTC
TaCHI-B1 CGGACCCAAACGGACAAAAAGCGAAC
101
TaCHI-A1 TTTAAT-----ATCGGTCTGCAGTGCAGGTGCAGTTTATGTT-TTATATCTTTTTTGAACATGCAGTTTATGTTGGTGATATGTTGAGTTCC
TaCHI-D1 TTTAATCTGTTGAGATCGGTCTGCAGTGCAGGTGTTTGT-TT-----TGTTTTTGAACATGCAGTTTATGTTGGTGATATGTTGAGTTCC
TaCHI-B1 AAAAT-----CACCGTCTTGGTGGGTGGGACCGTTGGAGTTGCTCTAATCTTATTATTCATGCC---TGAGGTAGGCGAACATTA----CT
201
TaCHI-A1 TTTCTTTGCGACACGGCAGACCTGTCATCGGCCAACAC-ACACGAGCGTCTCGTCTGGGCTCTCGCTGAGTT-----GAATGGTA-
TaCHI-D1 TTTGCTTTACGACACGGCAGACCTGTCATCGGCCAGCA-ACACGAGTGTCTGGTCTGGACTCGTGCCTGAGTTT-----TTTGGAGGACTCTGTC
TaCHI-B1 CTTGCTTACCCGTAGGTTGTTCTTTGAGATCGGTGTGCTTTGGTGACATGT-TGAGCGTGTGTCTGGTGT-----GGGCTCGTGC
301
TaCHI-A1 -----GCTCGCTTGACCTCGCCGCAAAACCTGGCGCGGGCCAGTCCGT-----CCTCTCAAGTGCCTCTCCTAACTACCACTAAC
TaCHI-D1 GTGAGTTGAATGTTAGCTTGACCTCGCCGCAAAACCTGGCGCGGGACACGTCTCTCTCT-----GCCCTCAAGTGCCTCTCCTAACTACCACTAAC
TaCHI-B1 GTGAGTTGAATGTTAGCTTGACCTCGCCGCAAAACCTGGCGCGGGCCAGTCCGTCTCTCTCTTTGCCCTCAAGTGCCTCTCCTAACTACCACTAAC
401
TaCHI-A1 ACGCCCCCAGACGCGCCACAAACTACATCTTTGCCACAAGGCACAA-AGTTACCCCTCCGTCTACG-----CGTAGGCCAAAGAACTAGAC
TaCHI-D1 ACGCCCCCAGATGCGCCACAAACTACATCTCTGCCACAAGGCACAA-AGTTACCCCTCCGTCTACGCTAGTCTAGGCCGCTAGGCCAGAGAACAGAC
TaCHI-B1 ACGCCCCCATATGCGCACACAAACTACATCTTTGCCACAAGGCACAAAGTTACCCCTCCGTCTACGCTAGTCTAGGCCGCTAGGCCAGAGAACAGAC
501
TaCHI-A1 CAGATTACGCGCGTGGCATAATCGCAATTACGGGACAGAGTCCACGGGCGTTTATATAGCCGCTGGGGTGTATATAGGAGAGG---GCACCACCAACCCCA
TaCHI-D1 CAGATTACGCGCGTGGCATAATCGCAATTACGGGACAGAGTCCACGGGCGTTTATATAGCCGTTGCGGTGTATATAGGAGGAGGACACCAACCAACCCCA
TaCHI-B1 CAGATTACGCGCGTGGCATAATCGCAATTACGGGACAGAGTCCACGGGCGTTTATATAGCCGTTGCGGTGTATATAGGAGGAGGACACCAACCAACCCCA
601
TaCHI-A1 GCTGACCATCCCGTGCGCCACGCTTCAAAGATCGCACCTACCCCTGCGCGGCGGCTGCCCCATCACATCAATACAAGCGTTGCTGCTACGTGCC
TaCHI-D1 GCTACCCATCCCGTGCGCCACGCTTCAAAGATCGCACCTACCCCTGCGCGG-----CCTGCCCCATCACATCAATACAAGTGTGCTGCTACGTGCC
TaCHI-B1 GCTACCCATCCCGTGCGCCACGCTTCAAAGATCGCACCTACCCCTGCGCGG-----CCTGCCCCGTCCTATCAATACAAGTGTGCTGCTACGTGCC
701
TaCHI-A1 GTC-----GTCTCCGAGACCCCTCCGCGCA-CCA-CCG-----AGACC
TaCHI-D1 GTC-----GTCTCCGAGACCCCTCCGTCGA-CCA-CC
TaCHI-B1 GTCGTCGTCTCCGAGACCCCTCCATCCATCCATCCGGGATATACC
```

## 2. Section S2: The alignment of *TaF3H* promoters

```
1
TaF3H-B1 TCTACAAGCCATGGAAATATGACGTGTCATGATGTATAGGTTTATAGATATTGGCGAACCAATCTGTGGTTGGATGTTAAAGGGACTCTGATATCCCA
TaF3H-B2 ATTTGCAACCGAGCGAGC--TTAGATGGTTAGATATTTCTTG-----TGGTGAACATA
101
TaF3H-B1 GTCCACTAAGGTTCAAA--TCTGGTGCTTGAGTTTATTC--TGGATTATTTAGGA-TTTTCGACGATGTGCATTCAGTAGGAGAAGACGTTCCCGTCCGA
TaF3H-B2 GCCCATCATGTTTCATAGTCTTAAGGCTTATTTGGTTTGGAGGAATTTATAGGACTTTTATACGATAGGATTTCTTATAGGAATTT--TTCTTAAAGC
201
TaF3H-B1 CAACGAGTTGCCACGATGACTTCGTAAATTTCAAGATAATATCCGATTCGGTCTTTCGGAGGTGCTCATAGGGGTAGGGTGTGCGTGTGTCGCTTTAT
TaF3H-B2 CTATTAAATTCATAGGAATGAATT--TTATTCTTACATAGAAAT-TGGTTCTATCCTTCA-----CACTTTAAAGTAAATATAA---TATGAATCTAG
301
TaF3H-B1 AGGGATGAGTGATGCACTATATGAGCGCTTGATCTGGAAGTGTGTTAAAAAAGTTCTAGATCTTGGTTGGTGTATAGCGGGTGTCCAGTGGTGT
TaF3H-B2 ACTCACTGGAATAAATCATAT-TATG-----TGAACTCATAGGATTTGAGAGACTTGTG--ATCTCATTTCCATA---CAAGTTTCTATT---T
401
TaF3H-B1 GTGTGCTTGATGTGTGTGTGTGCGTATATGGATCGATCGATACGGTGGATGGATGCAATGGGTGCGGCCGGTGTAGTTCGCGACCTAACACGAGTGC
TaF3H-B2 CTATGATAATGGTATAT-----CGTAT--GAACCAAAAGAACG--CTAATTTGACACTCGTGCATG--CATTTTCTGAATTTATTTCA-----
501
TaF3H-B1 CCGAGGGCGACTTCCTTGGTTAGTTGCGTGCACACGCGGACTTGCAGGTGCGGTCTGCCCCATCTTCCAAAGTATATACAAATGCCCTCTTCCCG
TaF3H-B2 -----GACTTTCT--GGTGTGTTTCAATCA-GTGGAGACAT-----CT--CCCTAATTTAAAGATGTTGTG--CCGGTTCAGTATTTC--
601
TaF3H-B1 GCCGTATATATCCCGGTGCGTACAACGTCAGAAAAACCAACCCAAACGGCCGAGCCTTTCATCAAGGAACAAACCATCATACGAGACAGACGCGCGCC
TaF3H-B2 -----AAAGGTACTCAGCGTTTATAGGC---ATCTCCCTAATTTAAATATATGTACCCCTCTTTC---ATCTAATCATACGAGACAGAGCTA--CA
701
TaF3H-B1 GCGACACAAGCGGACGATCCCGGAGTGCAGATCG
TaF3H-B2 GATCGATAACTGGTAGATAGCG
```

### 3. Section S3:CpG island prediction in promoters of *TaCHI* and *TaF3H* genes made with MethPrimer 2.0

Sequence Name: **Triticum aestivum chalcone flavanone isomerase (Chi-A1)**

Sequence Length: 1652 bp

Promoter Sequence: 1-754 bp

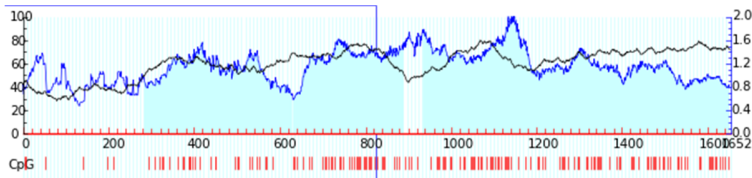

CpG Island Prediction

| No.      | Island size | Island start | Island end | GC% percent | O/E ratio |
|----------|-------------|--------------|------------|-------------|-----------|
| Island 1 | 346         | 284          | 629        | 50.0        | 0.6       |
| Island 2 | 258         | 632          | 889        | 50.0        | 0.6       |

Sequence Name: **Triticum aestivum chalcone flavanone isomerase (Chi-B1)**

Sequence Length: 1550 bp

Promoter Sequence: 1-636 bp

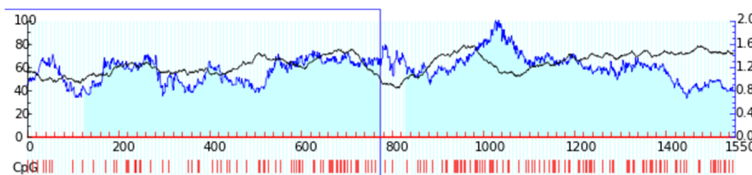

CpG Island Prediction

| No.      | Island size | Island start | Island end | GC% percent | O/E ratio |
|----------|-------------|--------------|------------|-------------|-----------|
| Island 1 | 645         | 128          | 772        | 50.0        | 0.6       |
| Island 2 | 719         | 831          | 1549       | 50.0        | 0.6       |

Sequence Name: **Triticum aestivum chalcone flavanone isomerase (Chi-D1)**

Sequence Length: 1559 bp

Promoter Sequence: 1-645 bp

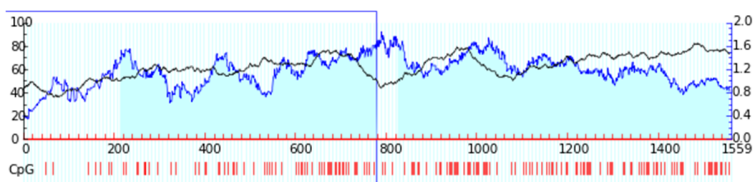

CpG Island Prediction

| No.      | Island size | Island start | Island end | GC% percent | O/E ratio |
|----------|-------------|--------------|------------|-------------|-----------|
| Island 1 | 564         | 215          | 778        | 50.0        | 0.6       |
| Island 2 | 733         | 826          | 1558       | 50.0        | 0.6       |

Sequence Name: **Triticum aestivum flavanone 3-hydroxylase (F3H-B1)**

Sequence Length: 2811 bp

Promoter Sequence: 1-731 bp

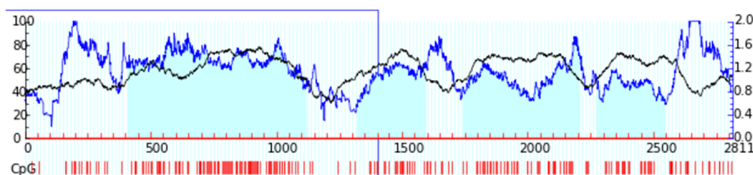

CpG Island Prediction

| No.      | Island size | Island start | Island end | GC% percent | O/E ratio |
|----------|-------------|--------------|------------|-------------|-----------|
| Island 1 | 711         | 409          | 1119       | 50.0        | 0.6       |
| Island 2 | 271         | 1324         | 1594       | 50.0        | 0.6       |
| Island 3 | 462         | 1746         | 2207       | 50.0        | 0.6       |
| Island 4 | 273         | 2273         | 2545       | 50.0        | 0.6       |

Sequence Name: **Triticum aestivum flavanone 3-hydroxylase (F3H-B2)**

Sequence Length: 1989 bp

Promoter Sequence: 1-577 bp

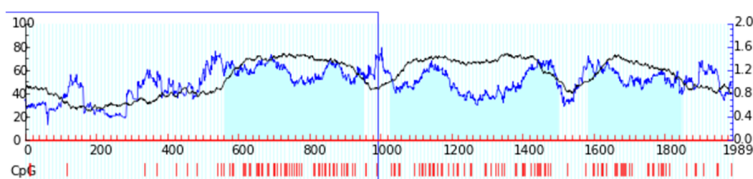

CpG Island Prediction

| No.      | Island size | Island start | Island end | GC%<br>percent | O/E ratio |
|----------|-------------|--------------|------------|----------------|-----------|
| Island 1 | 393         | 562          | 954        | 50.0           | 0.6       |
| Island 2 | 474         | 1029         | 1502       | 50.0           | 0.6       |
| Island 3 | 264         | 1586         | 1849       | 50.0           | 0.6       |





## Roots *TaChi-A1*

1102030405060708090100110120130

Chi-R1-r-1

AAAGGATTTGTTAGTTAGTATAGCATATTTAAAGGTTGCTGATTTATTTGATGATAAATATTGGAGTTTTATATTTATAGGCGATTTTTTATATTTGGTTGAGTATGGGTGAG

Chi-R1-r-2

AAAGGATTTGTTAGTTAGTATAGCATATTTAAAGGTTGCTGATTTATTTGATGATAAATATTGGAGTTTTATATTTATAGGCGATTTTTTATATTTGGTTGAGTATGGGTGAG

Chi-R1-r-3

AAAGGATTTGTTAGTTAGTATAGCATATTTAAAGGTTGCTGATTTATTTGATGATAAATATTGGAGTTTTATATTTATAGGCGATTTTTTATATTTGGTTGAGTATGGGTGAG

Chi-R1-r-4

AAAGGATTTGTTAGTTAGTATAGCATATTTAAAGGTTGCTGATTTATTTGATGATAAATATTGGAGTTTTATATTTATAGGCGATTTTTTATATTTGGTTGAGTATGGGTGAG

Chi-R1-r-8

AAAGGATTTGTTAGTTAGTATAGCATATTTAAAGGTTGCTGATTTATTTGATGATAAATATTGGAGTTTTATATTTATAGGCGATTTTTTATATTTGGTTGAGTATGGGTGAG

Chi-R1-r-7

AAAGGATTTGTTAGTTAGTATAGCATATTTAAAGGTTGCTGATTTATTTGATGATAAATATTGGAGTTTTATATTTATAGGCGATTTTTTATATTTGGTTGAGTATGGGTGAG

Chi-R1-r-6

AAAGGATTTGTTAGTTAGTATAGCATATTTAAAGGTTGCTGATTTATTTGATGATAAATATTGGAGTTTTATATTTATAGGCGATTTTTTATATTTGGTTGAGTATGGGTGAG

Chi-R1-r-5

AAAGGATTTGTTAGTTAGTATAGCATATTTAAAGGTTGCTGATTTATTTGATGATAAATATTGGAGTTTTATATTTATAGGCGATTTTTTATATTTGGTTGAGTATGGGTGAG

Chi-R1-r-9

AAAGGATTTGTTAGTTAGTATAGCATATTTAAAGGTTGCTGATTTATTTGATGATAAATATTGGAGTTTTATATTTATAGGCGATTTTTTATATTTGGTTGAGTATGGGTGAG

Chi-R1-r-10

AAAGGATTTGTTAGTTAGTATAGCATATTTAAAGGTTGCTGATTTATTTGATGATAAATATTGGAGTTTTATATTTATAGGCGATTTTTTATATTTGGTTGAGTATGGGTGAG

Chi-R1

AAAGGATTTGTTAGTTAGTATAGCATATTTAAAGGTTGCTGATTTATTTGATGATAAATATTGGAGTTTTATATTTATAGGCGATTTTTTATATTTGGTTGAGTATGGGTGAG

Consensus

AAAGGATTTGTTAGTTAGTATAGCATATTTAAAGGTTGCTGATTTATTTGATGATAAATATTGGAGTTTTATATTTATAGGCGATTTTTTATATTTGGTTGAGTATGGGTGAG

131140150160170180190200210220230240250261

Chi-R1-r-1

TTTAGTTTATATTTTTTGAAATATGTAGTTTATTTTGGTGATATGTTGAGTTTTTTTGTAGATGGTAGATTTGATTTGGTTATAGTATGAGGTGTTTGTGGGTTTGTGTGTA

Chi-R1-r-2

TTTAGTTTATATTTTTTGAAATATGTAGTTTATTTTGGTGATATGTTGAGTTTTTTTGTAGATGGTAGATTTGATTTGGTTATAGTATGAGGTGTTTGTGGGTTTGTGTGTA

Chi-R1-r-3

TTTAGTTTATATTTTTTGAAATATGTAGTTTATTTTGGTGATATGTTGAGTTTTTTTGTAGATGGTAGATTTGATTTGGTTATAGTATGAGGTGTTTGTGGGTTTGTGTGTA

Chi-R1-r-4

TTTAGTTTATATTTTTTGAAATATGTAGTTTATTTTGGTGATATGTTGAGTTTTTTTGTAGATGGTAGATTTGATTTGGTTATAGTATGAGGTGTTTGTGGGTTTGTGTGTA

Chi-R1-r-8

TTTAGTTTATATTTTTTGAAATATGTAGTTTATTTTGGTGATATGTTGAGTTTTTTTGTAGATGGTAGATTTGATTTGGTTATAGTATGAGGTGTTTGTGGGTTTGTGTGTA

Chi-R1-r-7

TTTAGTTTATATTTTTTGAAATATGTAGTTTATTTTGGTGATATGTTGAGTTTTTTTGTAGATGGTAGATTTGATTTGGTTATAGTATGAGGTGTTTGTGGGTTTGTGTGTA

Chi-R1-r-6

TTTAGTTTATATTTTTTGAAATATGTAGTTTATTTTGGTGATATGTTGAGTTTTTTTGTAGATGGTAGATTTGATTTGGTTATAGTATGAGGTGTTTGTGGGTTTGTGTGTA

Chi-R1-r-5

TTTAGTTTATATTTTTTGAAATATGTAGTTTATTTTGGTGATATGTTGAGTTTTTTTGTAGATGGTAGATTTGATTTGGTTATAGTATGAGGTGTTTGTGGGTTTGTGTGTA

Chi-R1-r-9

TTTAGTTTATATTTTTTGAAATATGTAGTTTATTTTGGTGATATGTTGAGTTTTTTTGTAGATGGTAGATTTGATTTGGTTATAGTATGAGGTGTTTGTGGGTTTGTGTGTA

Chi-R1-r-10

TTTAGTTTATATTTTTTGAAATATGTAGTTTATTTTGGTGATATGTTGAGTTTTTTTGTAGATGGTAGATTTGATTTGGTTATAGTATGAGGTGTTTGTGGGTTTGTGTGTA

Chi-R1

TTTAGTTTATATTTTTTGAAATATGTAGTTTATTTTGGTGATATGTTGAGTTTTTTTGTAGATGGTAGATTTGATTTGGTTATAGTATGAGGTGTTTGTGGGTTTGTGTGTA

Consensus

TTTAGTTTATATTTTTTGAAATATGTAGTTTATTTTGGTGATATGTTGAGTTTTTTTGTAGATGGTAGATTTGATTTGGTTATAGTATGAGGTGTTTGTGGGTTTGTGTGTA

261270280290300310320330340350360370380390

Chi-R1-r-1

GTTGARATGAGTTGTTGTGATTTGTTGTAAATTTGGTGTGGTATGTTGTTGTTTAAATGTTGTTTTTATATATATTAATATGTTTATAGATGCTTTAAATATATTTTGTATATA

Chi-R1-r-2

GTTGARATGAGTTGTTGTGATTTGTTGTAAATTTGGTGTGGTATGTTGTTGTTTAAATGTTGTTTTTATATATATTAATATGTTTATAGATGCTTTAAATATATTTTGTATATA

Chi-R1-r-3

GTTGARATGAGTTGTTGTGATTTGTTGTAAATTTGGTGTGGTATGTTGTTGTTTAAATGTTGTTTTTATATATATTAATATGTTTATAGATGCTTTAAATATATTTTGTATATA

Chi-R1-r-4

GTTGARATGAGTTGTTGTGATTTGTTGTAAATTTGGTGTGGTATGTTGTTGTTTAAATGTTGTTTTTATATATATTAATATGTTTATAGATGCTTTAAATATATTTTGTATATA

Chi-R1-r-8

GTTGARATGAGTTGTTGTGATTTGTTGTAAATTTGGTGTGGTATGTTGTTGTTTAAATGTTGTTTTTATATATATTAATATGTTTATAGATGCTTTAAATATATTTTGTATATA

Chi-R1-r-7

GTTGARATGAGTTGTTGTGATTTGTTGTAAATTTGGTGTGGTATGTTGTTGTTTAAATGTTGTTTTTATATATATTAATATGTTTATAGATGCTTTAAATATATTTTGTATATA

Chi-R1-r-6

GTTGARATGAGTTGTTGTGATTTGTTGTAAATTTGGTGTGGTATGTTGTTGTTTAAATGTTGTTTTTATATATATTAATATGTTTATAGATGCTTTAAATATATTTTGTATATA

Chi-R1-r-5

GTTGARATGAGTTGTTGTGATTTGTTGTAAATTTGGTGTGGTATGTTGTTGTTTAAATGTTGTTTTTATATATATTAATATGTTTATAGATGCTTTAAATATATTTTGTATATA

Chi-R1-r-9

GTTGARATGAGTTGTTGTGATTTGTTGTAAATTTGGTGTGGTATGTTGTTGTTTAAATGTTGTTTTTATATATATTAATATGTTTATAGATGCTTTAAATATATTTTGTATATA

Chi-R1-r-10

GTTGARATGAGTTGTTGTGATTTGTTGTAAATTTGGTGTGGTATGTTGTTGTTTAAATGTTGTTTTTATATATATTAATATGTTTATAGATGCTTTAAATATATTTTGTATATA

Chi-R1

GTTGARATGAGTTGTTGTGATTTGTTGTAAATTTGGTGTGGTATGTTGTTGTTTAAATGTTGTTTTTATATATATTAATATGTTTATAGATGCTTTAAATATATTTTGTATATA

Consensus

GTTGARATGAGTTGTTGTGATTTGTTGTAAATTTGGTGTGGTATGTTGTTGTTTAAATGTTGTTTTTATATATATTAATATGTTTATAGATGCTTTAAATATATTTTGTATATA

391400410420430440450460470480490500510520

Chi-R1-r-1

GGTARAGTTTATTTTTGTTATGCTGAGGTAAAGAAATAGATAGATTATGGTTGGTATATATGATTATGGGAGAGTTATGGGTTTATATAGTTGTGGGGTGTATATAGAGAGGGGT

Chi-R1-r-2

GGTARAGTTTATTTTTGTTATGCTGAGGTAAAGAAATAGATAGATTATGGTTGGTATATATGATTATGGGAGAGTTATGGGTTTATATAGTTGTGGGGTGTATATAGAGAGGGGT

Chi-R1-r-3

GGTARAGTTTATTTTTGTTATGCTGAGGTAAAGAAATAGATAGATTATGGTTGGTATATATGATTATGGGAGAGTTATGGGTTTATATAGTTGTGGGGTGTATATAGAGAGGGGT

Chi-R1-r-4

GGTARAGTTTATTTTTGTTATGCTGAGGTAAAGAAATAGATAGATTATGGTTGGTATATATGATTATGGGAGAGTTATGGGTTTATATAGTTGTGGGGTGTATATAGAGAGGGGT

Chi-R1-r-8

GGTARAGTTTATTTTTGTTATGCTGAGGTAAAGAAATAGATAGATTATGGTTGGTATATATGATTATGGGAGAGTTATGGGTTTATATAGTTGTGGGGTGTATATAGAGAGGGGT

Chi-R1-r-7

GGTARAGTTTATTTTTGTTATGCTGAGGTAAAGAAATAGATAGATTATGGTTGGTATATATGATTATGGGAGAGTTATGGGTTTATATAGTTGTGGGGTGTATATAGAGAGGGGT

Chi-R1-r-6

GGTARAGTTTATTTTTGTTATGCTGAGGTAAAGAAATAGATAGATTATGGTTGGTATATATGATTATGGGAGAGTTATGGGTTTATATAGTTGTGGGGTGTATATAGAGAGGGGT

Chi-R1-r-5

GGTARAGTTTATTTTTGTTATGCTGAGGTAAAGAAATAGATAGATTATGGTTGGTATATATGATTATGGGAGAGTTATGGGTTTATATAGTTGTGGGGTGTATATAGAGAGGGGT

Chi-R1-r-9

GGTARAGTTTATTTTTGTTATGCTGAGGTAAAGAAATAGATAGATTATGGTTGGTATATATGATTATGGGAGAGTTATGGGTTTATATAGTTGTGGGGTGTATATAGAGAGGGGT

Chi-R1-r-10

GGTARAGTTTATTTTTGTTATGCTGAGGTAAAGAAATAGATAGATTATGGTTGGTATATATGATTATGGGAGAGTTATGGGTTTATATAGTTGTGGGGTGTATATAGAGAGGGGT

Chi-R1

GGTARAGTTTATTTTTGTTATGCTGAGGTAAAGAAATAGATAGATTATGGTTGGTATATATGATTATGGGAGAGTTATGGGTTTATATAGTTGTGGGGTGTATATAGAGAGGGGT

Consensus

GGTARAGTTTATTTTTGTTATGCTGAGGTAAAGAAATAGATAGATTATGGTTGGTATATATGATTATGGGAGAGTTATGGGTTTATATAGTTGTGGGGTGTATATAGAGAGGGGT

521530540550560570580590600610620630640651

Chi-R1-r-1

ATATATATTTAGTTGATTTATTTGTGTGTATGTTTAAATAGATGATTTATTTGTTGGGTGGTGTGTTTTATATATTAATATAGTGTTTGTGTATGTGTGTGTTTTGGGAGTTTT

Chi-R1-r-2

ATATATATTTAGTTGATTTATTTGTGTGTATGTTTAAATAGATGATTTATTTGTTGGGTGGTGTGTTTTATATATTAATATAGTGTTTGTGTATGTGTGTGTTTTGGGAGTTTT

Chi-R1-r-3

ATATATATTTAGTTGATTTATTTGTGTGTATGTTTAAATAGATGATTTATTTGTTGGGTGGTGTGTTTTATATATTAATATAGTGTTTGTGTATGTGTGTGTTTTGGGAGTTTT

Chi-R1-r-4

ATATATATTTAGTTGATTTATTTGTGTGTATGTTTAAATAGATGATTTATTTGTTGGGTGGTGTGTTTTATATATTAATATAGTGTTTGTGTATGTGTGTGTTTTGGGAGTTTT

Chi-R1-r-8

ATATATATTTAGTTGATTTATTTGTGTGTATGTTTAAATAGATGATTTATTTGTTGGGTGGTGTGTTTTATATATTAATATAGTGTTTGTGTATGTGTGTGTTTTGGGAGTTTT

Chi-R1-r-7

ATATATATTTAGTTGATTTATTTGTGTGTATGTTTAAATAGATGATTTATTTGTTGGGTGGTGTGTTTTATATATTAATATAGTGTTTGTGTATGTGTGTGTTTTGGGAGTTTT

Chi-R1-r-6

ATATATATTTAGTTGATTTATTTGTGTGTATGTTTAAATAGATGATTTATTTGTTGGGTGGTGTGTTTTATATATTAATATAGTGTTTGTGTATGTGTGTGTTTTGGGAGTTTT

Chi-R1-r-5

ATATATATTTAGTTGATTTATTTGTGTGTATGTTTAAATAGATGATTTATTTGTTGGGTGGTGTGTTTTATATATTAATATAGTGTTTGTGTATGTGTGTGTTTTGGGAGTTTT

Chi-R1-r-9

ATATATATTTAGTTGATTTATTTGTGTGTATGTTTAAATAGATGATTTATTTGTTGGGTGGTGTGTTTTATATATTAATATAGTGTTTGTGTATGTGTGTGTTTTGGGAGTTTT

Chi-R1-r-10

ATATATATTTAGTTGATTTATTTGTGTGTATGTTTAAATAGATGATTTATTTGTTGGGTGGTGTGTTTTATATATTAATATAGTGTTTGTGTATGTGTGTGTTTTGGGAGTTTT

Chi-R1

ATATATATTTAGTTGATTTATTTGTGTGTATGTTTAAATAGATGATTTATTTGTTGGGTGGTGTGTTTTATATATTAATATAGTGTTTGTGTATGTGTGTGTTTTGGGAGTTTT

Consensus

ATATATATTTAGTTGATTTATTTGTGTGTATGTTTAAATAGATGATTTATTTGTTGGGTGGTGTGTTTTATATATTAATATAGTGTTTGTGTATGTGTGTGTTTTGGGAGTTTT

651660670680690700710720730

Chi-R1-r-1

TGTGTATATTTAGATATGGTGTGTGTTTGTAGTTTGAAGTTGATGGTGTGTTTTT-TGTGTTGTTGTTGTTGGTGG

Chi-R1-r-2

TGTGTATATTTAGATATGGTGTGTGTTTGTAGTTTGAAGTTGATGGTGTGTTTTT-TGTGTTGTTGTTGTTGGTGG

Chi-R1-r-3

TGTGTATATTTAGATATGGTGTGTGTTTGTAGTTTGAAGTTGATGGTGTGTTTTT-TGTGTTGTTGTTGTTGGTGG

Chi-R1-r-4

TGTGTATATTTAGATATGGTGTGTGTTTGTAGTTTGAAGTTGATGGTGTGTTTTT-TGTGTTGTTGTTGTTGGTGG

Chi-R1-r-8

TGTGTATATTTAGATATGGTGTGTGTTTGTAGTTTGAAGTTGATGGTGTGTTTTT-TGTGTTGTTGTTGTTGGTGG

Chi-R1-r-7

TGTGTATATTTAGATATGGTGTGTGTTTGTAGTTTGAAGTTGATGGTGTGTTTTT-TGTGTTGTTGTTGTTGGTGG

Chi-R1-r-6

TGTGTATATTTAGATATGGTGTGTGTTTGTAGTTTGAAGTTGATGGTGTGTTTTT-TGTGTTGTTGTTGTTGGTGG

Chi-R1-r-5

TGTGTATATTTAGATATGGTGTGTGTTTGTAGTTTGAAGTTGATGGTGTGTTTTT-TGTGTTGTTGTTGTTGGTGG

Chi-R1-r-9

CCGCGCATCATGGAGCATGTCGCGGCTGTGGTGTGAGGTCGATGGTGTGTTTTTTCGTCGTTGTTGTTGTTGGTGG

Chi-R1-r-10

CCGCGCATCATGGAGCATGTCGCGGCTGTGGTGTGAGGTCGATGGTGTGTTTTTTCGTCGTTGTTGTTGTTGGTGG

Chi-R1

CCGCGCATCATGGAGCATGTCGCGGCTGTGGTGTGAGGTCGATGGTGTGTTTTTTCGTCGTTGTTGTTGTTGGTGG

Consensus

CCGCGCATCATGGAGCATGTCGCGGCTGTGGTGTGAGGTCGATGGTGTGTTTTTTCGTCGTTGTTGTTGTTGGTGG



## Coleoptiles *TaChi-B1*

[illegible]

### Roots *TaChi-B1*

Figure 1. Consensus sequence of the 100 bp DNA fragments. The figure displays a grid of DNA sequences for 100 bp fragments, organized into 10 rows (Chi-B1-r-1 to Chi-B1-r-10) and 10 columns (1 to 100). Each row represents a different fragment, and each column represents a specific position within the 100 bp fragment. The sequences are shown in a color-coded format, with each nucleotide (A, T, C, G) represented by a unique color. The consensus sequence for each fragment is indicated by a horizontal line at the bottom of each column, showing the most frequent nucleotide at that position. The consensus sequence for the entire 100 bp fragment is shown at the bottom of the grid.

## Coleoptiles *TaChi-D1*

Figure 1. Schematic representation of the genomic organization of the *hTERT* gene. The gene is located on chromosome 5p15.3 and consists of 11 exons and 10 introns. The exons are numbered 1 to 11, and the introns are numbered 1 to 10. The gene structure is shown as a series of boxes representing exons and lines representing introns. The scale bar at the top indicates the position of the gene on the chromosome, with markers at 10, 20, 30, 40, 50, 60, 70, 80, 90, 100, 110, 120, and 130. The scale bar at the bottom indicates the position of the gene on the chromosome, with markers at 261, 270, 280, 290, 300, 310, 320, 330, 340, 350, 360, 370, 380, and 390. The gene structure is shown as a series of boxes representing exons and lines representing introns. The scale bar at the top indicates the position of the gene on the chromosome, with markers at 10, 20, 30, 40, 50, 60, 70, 80, 90, 100, 110, 120, and 130. The scale bar at the bottom indicates the position of the gene on the chromosome, with markers at 261, 270, 280, 290, 300, 310, 320, 330, 340, 350, 360, 370, 380, and 390.



## Roots *TaChi-D1*

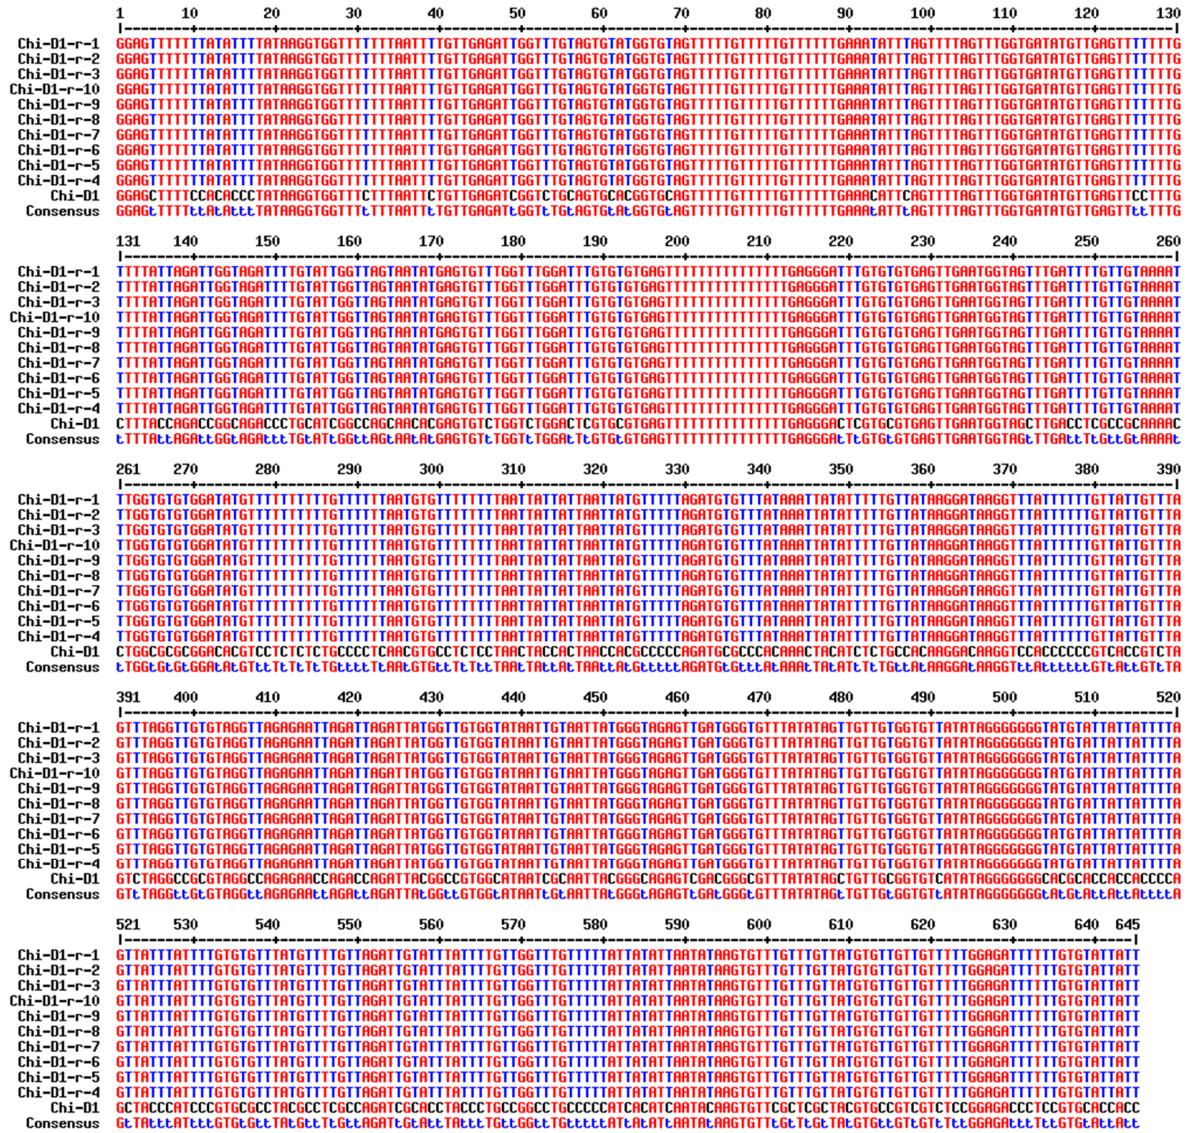

### Coleoptiles *TaF3H-B1*

[illegible]



## Roots *TaF3H-B1*

|             |                                                                                                                                   |     |     |     |     |     |     |     |     |     |     |     |     |     |
|-------------|-----------------------------------------------------------------------------------------------------------------------------------|-----|-----|-----|-----|-----|-----|-----|-----|-----|-----|-----|-----|-----|
|             | 1                                                                                                                                 | 10  | 20  | 30  | 40  | 50  | 60  | 70  | 80  | 90  | 100 | 110 | 120 | 130 |
| F3H-B1-r-1  | TTTATAGGATATGGAARATATGATGCTATGATGATATGAGTTTACGATATTTGGGTGAATTAATTTGGTGTGGATGGTTAARGGGATTTTGATATCCCTAGTCCCTARGGTTCAARATCTGGGTTTGAG |     |     |     |     |     |     |     |     |     |     |     |     |     |
| F3H-B1-r-2  | TTTATAGGATATGGAARATATGATGCTATGATGATATGAGTTTACGATATTTGGGTGAATTAATTTGGTGTGGATGGTTAARGGGATTTTGATATCCCTAGTCCCTARGGTTCAARATCTGGGTTTGAG |     |     |     |     |     |     |     |     |     |     |     |     |     |
| F3H-B1-r-3  | TTTATAGGATATGGAARATATGATGCTATGATGATATGAGTTTACGATATTTGGGTGAATTAATTTGGTGTGGATGGTTAARGGGATTTTGATATCCCTAGTCCCTARGGTTCAARATCTGGGTTTGAG |     |     |     |     |     |     |     |     |     |     |     |     |     |
| F3H-B1-r-8  | TTTATAGGATATGGAARATATGATGCTATGATGATATGAGTTTACGATATTTGGGTGAATTAATTTGGTGTGGATGGTTAARGGGATTTTGATATCCCTAGTCCCTARGGTTCAARATCTGGGTTTGAG |     |     |     |     |     |     |     |     |     |     |     |     |     |
| F3H-B1-r-4  | TTTATAGGATATGGAARATATGATGCTATGATGATATGAGTTTACGATATTTGGGTGAATTAATTTGGTGTGGATGGTTAARGGGATTTTGATATCCCTAGTCCCTARGGTTCAARATCTGGGTTTGAG |     |     |     |     |     |     |     |     |     |     |     |     |     |
| F3H-B1-r-5  | TTTATAGGATATGGAARATATGATGCTATGATGATATGAGTTTACGATATTTGGGTGAATTAATTTGGTGTGGATGGTTAARGGGATTTTGATATCCCTAGTCCCTARGGTTCAARATCTGGGTTTGAG |     |     |     |     |     |     |     |     |     |     |     |     |     |
| F3H-B1-r-6  | TTTATAGGATATGGAARATATGATGCTATGATGATATGAGTTTACGATATTTGGGTGAATTAATTTGGTGTGGATGGTTAARGGGATTTTGATATCCCTAGTCCCTARGGTTCAARATCTGGGTTTGAG |     |     |     |     |     |     |     |     |     |     |     |     |     |
| F3H-B1-r-7  | TTTATAGGATATGGAARATATGATGCTATGATGATATGAGTTTACGATATTTGGGTGAATTAATTTGGTGTGGATGGTTAARGGGATTTTGATATCCCTAGTCCCTARGGTTCAARATCTGGGTTTGAG |     |     |     |     |     |     |     |     |     |     |     |     |     |
| F3H-B1-r-9  | TTTATAGGATATGGAARATATGATGCTATGATGATATGAGTTTACGATATTTGGGTGAATTAATTTGGTGTGGATGGTTAARGGGATTTTGATATCCCTAGTCCCTARGGTTCAARATCTGGGTTTGAG |     |     |     |     |     |     |     |     |     |     |     |     |     |
| F3H-B1-r-10 | TTTATAGGATATGGAARATATGATGCTATGATGATATGAGTTTACGATATTTGGGTGAATTAATTTGGTGTGGATGGTTAARGGGATTTTGATATCCCTAGTCCCTARGGTTCAARATCTGGGTTTGAG |     |     |     |     |     |     |     |     |     |     |     |     |     |
| F3H-B1      | TTTATAGGATATGGAARATATGATGCTATGATGATATGAGTTTACGATATTTGGGTGAATTAATTTGGTGTGGATGGTTAARGGGATTTTGATATCCCTAGTCCCTARGGTTCAARATCTGGGTTTGAG |     |     |     |     |     |     |     |     |     |     |     |     |     |
| Consensus   | TTTATAGGATATGGAARATATGATGCTATGATGATATGAGTTTACGATATTTGGGTGAATTAATTTGGTGTGGATGGTTAARGGGATTTTGATATCCCTAGTCCCTARGGTTCAARATCTGGGTTTGAG |     |     |     |     |     |     |     |     |     |     |     |     |     |
|             | 131                                                                                                                               | 140 | 150 | 160 | 170 | 180 | 190 | 200 | 210 | 220 | 230 | 240 | 250 | 261 |
| F3H-B1-r-1  | TTTATCTCGGATATTTCCAGGATTTTCAGCATGATGTTATTAGTAGGAGAGAGCGTTTCGTCGATARCAGAGTTGTCATGATGATTCGTAARATTCARGATATATGTCGATTCCGGTCTTCGGAGG    |     |     |     |     |     |     |     |     |     |     |     |     |     |
| F3H-B1-r-2  | TTTATCTCGGATATTTCCAGGATTTTCAGCATGATGTTATTAGTAGGAGAGAGCGTTTCGTCGATARCAGAGTTGTCATGATGATTCGTAARATTCARGATATATGTCGATTCCGGTCTTCGGAGG    |     |     |     |     |     |     |     |     |     |     |     |     |     |
| F3H-B1-r-3  | TTTATCTCGGATATTTCCAGGATTTTCAGCATGATGTTATTAGTAGGAGAGAGCGTTTCGTCGATARCAGAGTTGTCATGATGATTCGTAARATTCARGATATATGTCGATTCCGGTCTTCGGAGG    |     |     |     |     |     |     |     |     |     |     |     |     |     |
| F3H-B1-r-8  | TTTATCTCGGATATTTCCAGGATTTTCAGCATGATGTTATTAGTAGGAGAGAGCGTTTCGTCGATARCAGAGTTGTCATGATGATTCGTAARATTCARGATATATGTCGATTCCGGTCTTCGGAGG    |     |     |     |     |     |     |     |     |     |     |     |     |     |
| F3H-B1-r-4  | TTTATCTCGGATATTTCCAGGATTTTCAGCATGATGTTATTAGTAGGAGAGAGCGTTTCGTCGATARCAGAGTTGTCATGATGATTCGTAARATTCARGATATATGTCGATTCCGGTCTTCGGAGG    |     |     |     |     |     |     |     |     |     |     |     |     |     |
| F3H-B1-r-5  | TTTATCTCGGATATTTCCAGGATTTTCAGCATGATGTTATTAGTAGGAGAGAGCGTTTCGTCGATARCAGAGTTGTCATGATGATTCGTAARATTCARGATATATGTCGATTCCGGTCTTCGGAGG    |     |     |     |     |     |     |     |     |     |     |     |     |     |
| F3H-B1-r-6  | TTTATCTCGGATATTTCCAGGATTTTCAGCATGATGTTATTAGTAGGAGAGAGCGTTTCGTCGATARCAGAGTTGTCATGATGATTCGTAARATTCARGATATATGTCGATTCCGGTCTTCGGAGG    |     |     |     |     |     |     |     |     |     |     |     |     |     |
| F3H-B1-r-7  | TTTATCTCGGATATTTCCAGGATTTTCAGCATGATGTTATTAGTAGGAGAGAGCGTTTCGTCGATARCAGAGTTGTCATGATGATTCGTAARATTCARGATATATGTCGATTCCGGTCTTCGGAGG    |     |     |     |     |     |     |     |     |     |     |     |     |     |
| F3H-B1-r-9  | TTTATCTCGGATATTTCCAGGATTTTCAGCATGATGTTATTAGTAGGAGAGAGCGTTTCGTCGATARCAGAGTTGTCATGATGATTCGTAARATTCARGATATATGTCGATTCCGGTCTTCGGAGG    |     |     |     |     |     |     |     |     |     |     |     |     |     |
| F3H-B1-r-10 | TTTATCTCGGATATTTCCAGGATTTTCAGCATGATGTTATTAGTAGGAGAGAGCGTTTCGTCGATARCAGAGTTGTCATGATGATTCGTAARATTCARGATATATGTCGATTCCGGTCTTCGGAGG    |     |     |     |     |     |     |     |     |     |     |     |     |     |
| F3H-B1      | TTTATCTCGGATATTTCCAGGATTTTCAGCATGATGTTATTAGTAGGAGAGAGCGTTTCGTCGATARCAGAGTTGTCATGATGATTCGTAARATTCARGATATATGTCGATTCCGGTCTTCGGAGG    |     |     |     |     |     |     |     |     |     |     |     |     |     |
| Consensus   | TTTATCTCGGATATTTCCAGGATTTTCAGCATGATGTTATTAGTAGGAGAGAGCGTTTCGTCGATARCAGAGTTGTCATGATGATTCGTAARATTCARGATATATGTCGATTCCGGTCTTCGGAGG    |     |     |     |     |     |     |     |     |     |     |     |     |     |
|             | 261                                                                                                                               | 270 | 280 | 290 | 300 | 310 | 320 | 330 | 340 | 350 | 360 | 370 | 380 | 390 |
| F3H-B1-r-1  | TGCTCATAGGGGATAGGGGTGCGGTGTCGCTTTATAGGAGTGAAGTATGACGATATATGAGGCCCTTGATCTGGATGCTGTGTAAARAAAGGTTTAGATTTGGTGGGTATATGTTGGGTTTAG       |     |     |     |     |     |     |     |     |     |     |     |     |     |
| F3H-B1-r-2  | TGCTCATAGGGGATAGGGGTGCGGTGTCGCTTTATAGGAGTGAAGTATGACGATATATGAGGCCCTTGATCTGGATGCTGTGTAAARAAAGGTTTAGATTTGGTGGGTATATGTTGGGTTTAG       |     |     |     |     |     |     |     |     |     |     |     |     |     |
| F3H-B1-r-3  | TGCTCATAGGGGATAGGGGTGCGGTGTCGCTTTATAGGAGTGAAGTATGACGATATATGAGGCCCTTGATCTGGATGCTGTGTAAARAAAGGTTTAGATTTGGTGGGTATATGTTGGGTTTAG       |     |     |     |     |     |     |     |     |     |     |     |     |     |
| F3H-B1-r-8  | TGCTCATAGGGGATAGGGGTGCGGTGTCGCTTTATAGGAGTGAAGTATGACGATATATGAGGCCCTTGATCTGGATGCTGTGTAAARAAAGGTTTAGATTTGGTGGGTATATGTTGGGTTTAG       |     |     |     |     |     |     |     |     |     |     |     |     |     |
| F3H-B1-r-4  | TGCTCATAGGGGATAGGGGTGCGGTGTCGCTTTATAGGAGTGAAGTATGACGATATATGAGGCCCTTGATCTGGATGCTGTGTAAARAAAGGTTTAGATTTGGTGGGTATATGTTGGGTTTAG       |     |     |     |     |     |     |     |     |     |     |     |     |     |
| F3H-B1-r-5  | TGCTCATAGGGGATAGGGGTGCGGTGTCGCTTTATAGGAGTGAAGTATGACGATATATGAGGCCCTTGATCTGGATGCTGTGTAAARAAAGGTTTAGATTTGGTGGGTATATGTTGGGTTTAG       |     |     |     |     |     |     |     |     |     |     |     |     |     |
| F3H-B1-r-6  | TGCTCATAGGGGATAGGGGTGCGGTGTCGCTTTATAGGAGTGAAGTATGACGATATATGAGGCCCTTGATCTGGATGCTGTGTAAARAAAGGTTTAGATTTGGTGGGTATATGTTGGGTTTAG       |     |     |     |     |     |     |     |     |     |     |     |     |     |
| F3H-B1-r-7  | TGCTCATAGGGGATAGGGGTGCGGTGTCGCTTTATAGGAGTGAAGTATGACGATATATGAGGCCCTTGATCTGGATGCTGTGTAAARAAAGGTTTAGATTTGGTGGGTATATGTTGGGTTTAG       |     |     |     |     |     |     |     |     |     |     |     |     |     |
| F3H-B1-r-9  | TGCTCATAGGGGATAGGGGTGCGGTGTCGCTTTATAGGAGTGAAGTATGACGATATATGAGGCCCTTGATCTGGATGCTGTGTAAARAAAGGTTTAGATTTGGTGGGTATATGTTGGGTTTAG       |     |     |     |     |     |     |     |     |     |     |     |     |     |
| F3H-B1-r-10 | TGCTCATAGGGGATAGGGGTGCGGTGTCGCTTTATAGGAGTGAAGTATGACGATATATGAGGCCCTTGATCTGGATGCTGTGTAAARAAAGGTTTAGATTTGGTGGGTATATGTTGGGTTTAG       |     |     |     |     |     |     |     |     |     |     |     |     |     |
| F3H-B1      | TGCTCATAGGGGATAGGGGTGCGGTGTCGCTTTATAGGAGTGAAGTATGACGATATATGAGGCCCTTGATCTGGATGCTGTGTAAARAAAGGTTTAGATTTGGTGGGTATATGTTGGGTTTAG       |     |     |     |     |     |     |     |     |     |     |     |     |     |
| Consensus   | TGCTCATAGGGGATAGGGGTGCGGTGTCGCTTTATAGGAGTGAAGTATGACGATATATGAGGCCCTTGATCTGGATGCTGTGTAAARAAAGGTTTAGATTTGGTGGGTATATGTTGGGTTTAG       |     |     |     |     |     |     |     |     |     |     |     |     |     |
|             | 391                                                                                                                               | 400 | 410 | 420 | 430 | 440 | 450 | 460 | 470 | 480 | 490 | 500 | 510 | 520 |
| F3H-B1-r-1  | TGGTGTGTGTGTTGATGTGTGTGTTGTGTGTATATGATGATGATGATGGTGGATGGATGATGGGGTGGGTTGGTATGTGCGTATTAATATGAGTGTGTGAGGGGATTTTTGGGTAG              |     |     |     |     |     |     |     |     |     |     |     |     |     |
| F3H-B1-r-2  | TGGTGTGTGTGTTGATGTGTGTGTTGTGTGTATATGATGATGATGATGGTGGATGGATGATGGGGTGGGTTGGTATGTGCGTATTAATATGAGTGTGTGAGGGGATTTTTGGGTAG              |     |     |     |     |     |     |     |     |     |     |     |     |     |
| F3H-B1-r-3  | TGGTGTGTGTGTTGATGTGTGTGTTGTGTGTATATGATGATGATGATGGTGGATGGATGATGGGGTGGGTTGGTATGTGCGTATTAATATGAGTGTGTGAGGGGATTTTTGGGTAG              |     |     |     |     |     |     |     |     |     |     |     |     |     |
| F3H-B1-r-8  | TGGTGTGTGTGTTGATGTGTGTGTTGTGTGTATATGATGATGATGATGGTGGATGGATGATGGGGTGGGTTGGTATGTGCGTATTAATATGAGTGTGTGAGGGGATTTTTGGGTAG              |     |     |     |     |     |     |     |     |     |     |     |     |     |
| F3H-B1-r-4  | TGGTGTGTGTGTTGATGTGTGTGTTGTGTGTATATGATGATGATGATGGTGGATGGATGATGGGGTGGGTTGGTATGTGCGTATTAATATGAGTGTGTGAGGGGATTTTTGGGTAG              |     |     |     |     |     |     |     |     |     |     |     |     |     |
| F3H-B1-r-5  | TGGTGTGTGTGTTGATGTGTGTGTTGTGTGTATATGATGATGATGATGGTGGATGGATGATGGGGTGGGTTGGTATGTGCGTATTAATATGAGTGTGTGAGGGGATTTTTGGGTAG              |     |     |     |     |     |     |     |     |     |     |     |     |     |
| F3H-B1-r-6  | TGGTGTGTGTGTTGATGTGTGTGTTGTGTGTATATGATGATGATGATGGTGGATGGATGATGGGGTGGGTTGGTATGTGCGTATTAATATGAGTGTGTGAGGGGATTTTTGGGTAG              |     |     |     |     |     |     |     |     |     |     |     |     |     |
| F3H-B1-r-7  | TGGTGTGTGTGTTGATGTGTGTGTTGTGTGTATATGATGATGATGATGGTGGATGGATGATGGGGTGGGTTGGTATGTGCGTATTAATATGAGTGTGTGAGGGGATTTTTGGGTAG              |     |     |     |     |     |     |     |     |     |     |     |     |     |
| F3H-B1-r-9  | TGGTGTGTGTGTTGATGTGTGTGTTGTGTGTATATGATGATGATGATGGTGGATGGATGATGGGGTGGGTTGGTATGTGCGTATTAATATGAGTGTGTGAGGGGATTTTTGGGTAG              |     |     |     |     |     |     |     |     |     |     |     |     |     |
| F3H-B1-r-10 | TGGTGTGTGTGTTGATGTGTGTGTTGTGTGTATATGATGATGATGATGGTGGATGGATGATGGGGTGGGTTGGTATGTGCGTATTAATATGAGTGTGTGAGGGGATTTTTGGGTAG              |     |     |     |     |     |     |     |     |     |     |     |     |     |
| F3H-B1      | TGGTGTGTGTGTTGATGTGTGTGTTGTGTGTATATGATGATGATGATGGTGGATGGATGATGGGGTGGGTTGGTATGTGCGTATTAATATGAGTGTGTGAGGGGATTTTTGGGTAG              |     |     |     |     |     |     |     |     |     |     |     |     |     |
| Consensus   | TGGTGTGTGTGTTGATGTGTGTGTTGTGTGTATATGATGATGATGATGGTGGATGGATGATGGGGTGGGTTGGTATGTGCGTATTAATATGAGTGTGTGAGGGGATTTTTGGGTAG              |     |     |     |     |     |     |     |     |     |     |     |     |     |
|             | 521                                                                                                                               | 530 | 540 | 550 | 560 | 570 | 580 | 590 | 600 | 610 | 620 | 630 | 640 | 651 |
| F3H-B1-r-1  | TGTGTGCGCATGTGTGACTGTAGGGTCGCGTTGCCCTTATCTTTCARATGATGATATATATGCTCTCTTTTGGTCGATATATCTGTGTGCGATACACGTTAGAAAATATAAATTAACGGCTC        |     |     |     |     |     |     |     |     |     |     |     |     |     |
| F3H-B1-r-2  | TGTGTGCGCATGTGTGACTGTAGGGTCGCGTTGCCCTTATCTTTCARATGATGATATATATGCTCTCTTTTGGTCGATATATCTGTGTGCGATACACGTTAGAAAATATAAATTAACGGTC         |     |     |     |     |     |     |     |     |     |     |     |     |     |
| F3H-B1-r-3  | TGTGTGCGCATGTGTGACTGTAGGGTCGCGTTGCCCTTATCTTTCARATGATGATATATATGCTCTCTTTTGGTCGATATATCTGTGTGCGATACACGTTAGAAAATATAAATTAACGGTC         |     |     |     |     |     |     |     |     |     |     |     |     |     |
| F3H-B1-r-8  | TGTGTGCGCATGTGTGACTGTAGGGTCGCGTTGCCCTTATCTTTCARATGATGATATATATGCTCTCTTTTGGTCGATATATCTGTGTGCGATACACGTTAGAAAATATAAATTAACGGTC         |     |     |     |     |     |     |     |     |     |     |     |     |     |
| F3H-B1-r-4  | TGTGTGCGCATGTGTGACTGTAGGGTCGCGTTGCCCTTATCTTTCARATGATGATATATATGCTCTCTTTTGGTCGATATATCTGTGTGCGATACACGTTAGAAAATATAAATTAACGGTC         |     |     |     |     |     |     |     |     |     |     |     |     |     |
| F3H-B1-r-5  | TGTGTGCGCATGTGTGACTGTAGGGTCGCGTTGCCCTTATCTTTCARATGATGATATATATGCTCTCTTTTGGTCGATATATCTGTGTGCGATACACGTTAGAAAATATAAATTAACGGTC         |     |     |     |     |     |     |     |     |     |     |     |     |     |
| F3H-B1-r-6  | TGTGTGCGCATGTGTGACTGTAGGGTCGCGTTGCCCTTATCTTTCARATGATGATATATATGCTCTCTTTTGGTCGATATATCTGTGTGCGATACACGTTAGAAAATATAAATTAACGGTC         |     |     |     |     |     |     |     |     |     |     |     |     |     |
| F3H-B1-r-7  | TGTGTGCGCATGTGTGACTGTAGGGTCGCGTTGCCCTTATCTTTCARATGATGATATATATGCTCTCTTTTGGTCGATATATCTGTGTGCGATACACGTTAGAAAATATAAATTAACGGTC         |     |     |     |     |     |     |     |     |     |     |     |     |     |
| F3H-B1-r-9  | TGTGTGCGCATGTGTGACTGTAGGGTCGCGTTGCCCTTATCTTTCARATGATGATATATATGCTCTCTTTTGGTCGATATATCTGTGTGCGATACACGTTAGAAAATATAAATTAACGGTC         |     |     |     |     |     |     |     |     |     |     |     |     |     |
| F3H-B1-r-10 | TGTGTGCGCATGTGTGACTGTAGGGTCGCGTTGCCCTTATCTTTCARATGATGATATATATGCTCTCTTTTGGTCGATATATCTGTGTGCGATACACGTTAGAAAATATAAATTAACGGTC         |     |     |     |     |     |     |     |     |     |     |     |     |     |
| F3H-B1      | TGTGTGCGCATGTGTGACTGTAGGGTCGCGTTGCCCTTATCTTTCARATGATGATATATATGCTCTCTTTTGGTCGATATATCTGTGTGCGATACACGTTAGAAAATATAAATTAACGGTC         |     |     |     |     |     |     |     |     |     |     |     |     |     |
| Consensus   | TGTGTGCGCATGTGTGACTGTAGGGTCGCGTTGCCCTTATCTTTCARATGATGATATATATGCTCTCTTTTGGTCGATATATCTGTGTGCGATACACGTTAGAAAATATAAATTAACGGTC         |     |     |     |     |     |     |     |     |     |     |     |     |     |
|             | 651                                                                                                                               | 660 | 670 | 680 | 690 | 700 | 710 | 720 | 730 | 740 | 750 | 760 | 766 |     |
| F3H-B1-r-1  | GAGTGTGTTTATAGGGAATAAATATATATGAGATAGATGTTGGTGTGATATAGTGGATGATTTTGGAGTGGATGATGTGGTGTGTTGGTGAATACAGAGAGCTTCTCCCGA                   |     |     |     |     |     |     |     |     |     |     |     |     |     |
| F3H-B1-r-2  | GAGTGTGTTTATAGGGAATAAATATATATGAGATAGATGTTGGTGTGATATAGTGGATGATTTTGGAGTGGATGATGTGGTGTGTTGGTGAATACAGAGAGCTTCTCCCGA                   |     |     |     |     |     |     |     |     |     |     |     |     |     |
| F3H-B1-r-3  | GAGTGTGTTTATAGGGAATAAATATATATGAGATAGATGTTGGTGTGATATAGTGGATGATTTTGGAGTGGATGATGTGGTGTGTTGGTGAATACAGAGAGCTTCTCCCGA                   |     |     |     |     |     |     |     |     |     |     |     |     |     |
| F3H-B1-r-8  | GAGTGTGTTTATAGGGAATAAATATATATGAGATAGATGTTGGTGTGATATAGTGGATGATTTTGGAGTGGATGATGTGGTGTGTTGGTGAATACAGAGAGCTTCTCCCGA                   |     |     |     |     |     |     |     |     |     |     |     |     |     |
| F3H-B1-r-4  | GAGTGTGTTTATAGGGAATAAATATATATGAGATAGATGTTGGTGTGATATAGTGGATGATTTTGGAGTGGATGATGTGGTGTGTTGGTGAATACAGAGAGCTTCTCCCTGA                  |     |     |     |     |     |     |     |     |     |     |     |     |     |
| F3H-B1-r-5  | GAGTGTGTTTATAGGGAATAAATATATATGAGATAGATGTTGGTGTGATATAGTGGATGATTTTGGAGTGGATGATGTGGTGTGTTGGTGAATACAGAGAGCTTCTCCCTGA                  |     |     |     |     |     |     |     |     |     |     |     |     |     |
| F3H-B1-r-6  | GAGTGTGTTTATAGGGAATAAATATATATGAGATAGATGTTGGTGTGATATAGTGGATGATTTTGGAGTGGATGATGTGGTGTGTTGGTGAATACAGAGAGCTTCTCCCTGA                  |     |     |     |     |     |     |     |     |     |     |     |     |     |
| F3H-B1-r-7  | GAGTGTGTTTATAGGGAATAAATATATATGAGATAGATGTTGGTGTGATATAGTGGATGATTTTGGAGTGGATGATGTGGTGTGTTGGTGAATACAGAGAGCTTCTCCCTGA                  |     |     |     |     |     |     |     |     |     |     |     |     |     |
| F3H-B1-r-9  | GAGTGTGTTTATAGGGAATAAATATATATGAGATAGATGTTGGTGTGATATAGTGGATGATTTTGGAGTGGATGATGTGGTGTGTTGGTGAATACAGAGAGCTTCTCCCGA                   |     |     |     |     |     |     |     |     |     |     |     |     |     |
| F3H-B1-r-10 | GAGTGTGTTTATAGGGAATAAATATATATGAGATAGATGTTGGTGTGATATAGTGGATGATTTTGGAGTGGATGATGTGGTGTGTTGGTGAATACAGAGAGCTTCTCCCGA                   |     |     |     |     |     |     |     |     |     |     |     |     |     |
| F3H-B1      | GAGTGTGTTTATAGGGAATAAATATATATGAGATAGATGTTGGTGTGATATAGTGGATGATTTTGGAGTGGATGATGTGGTGTGTTGGTGAATACAGAGAGCTTCTCCCGA                   |     |     |     |     |     |     |     |     |     |     |     |     |     |
| Consensus   | GAGGCTTTTATCAGAGGAACACACCTATACAGAGACAGCGCCCGCCAGACAGCGGACGATCCCGGAGTCGATATCCGGTCGCTGAGCAGCAGAGAGCTTCTCCCGA                        |     |     |     |     |     |     |     |     |     |     |     |     |     |
|             | GAGGCTTTTATCAGAGGAACACCTATACAGAGACAGCGCCCGCCAGACAGCGGACGATCCCGGAGTCGATATCCGGTCGCTGAGCAGCAGAGAGCTTCTCCCGA                          |     |     |     |     |     |     |     |     |     |     |     |     |     |
|             | GAGGCTTTTATCAGAGGAACACCTATACAGAGACAGCGCCCGCCAGACAGCGGACGATCCCGGAGTCGATATCCGGTCGCTGAGCAGCAGAGAGCTTCTCCCGA                          |     |     |     |     |     |     |     |     |     |     |     |     |     |



# Coleoptiles *TaF3H-B2*

|             | 1   | 10   | 20  | 30  | 40   | 50  | 60  | 70   | 80  | 90  | 100 | 110  | 120 | 130 |
|-------------|-----|------|-----|-----|------|-----|-----|------|-----|-----|-----|------|-----|-----|
| F3h-B2-c-1  | ATT | TGT  | AAT | GAG | TAG  | TAG | TAG | TAG  | TAG | TAG | TAG | TAG  | TAG | TAG |
| F3h-B2-c-2  | ATT | TGT  | AAT | GAG | TAG  | TAG | TAG | TAG  | TAG | TAG | TAG | TAG  | TAG | TAG |
| F3h-B2-c-3  | ATT | TGT  | AAT | GAG | TAG  | TAG | TAG | TAG  | TAG | TAG | TAG | TAG  | TAG | TAG |
| F3h-B2-c-4  | ATT | TGT  | AAT | GAG | TAG  | TAG | TAG | TAG  | TAG | TAG | TAG | TAG  | TAG | TAG |
| F3h-B2-c-5  | ATT | TGT  | AAT | GAG | TAG  | TAG | TAG | TAG  | TAG | TAG | TAG | TAG  | TAG | TAG |
| F3h-B2-c-6  | ATT | TGT  | AAT | GAG | TAG  | TAG | TAG | TAG  | TAG | TAG | TAG | TAG  | TAG | TAG |
| F3h-B2-c-7  | ATT | TGT  | AAT | GAG | TAG  | TAG | TAG | TAG  | TAG | TAG | TAG | TAG  | TAG | TAG |
| F3h-B2-c-8  | ATT | TGT  | AAT | GAG | TAG  | TAG | TAG | TAG  | TAG | TAG | TAG | TAG  | TAG | TAG |
| F3h-B2-c-9  | ATT | TGT  | AAT | GAG | TAG  | TAG | TAG | TAG  | TAG | TAG | TAG | TAG  | TAG | TAG |
| F3h-B2-c-10 | ATT | TGT  | AAT | GAG | TAG  | TAG | TAG | TAG  | TAG | TAG | TAG | TAG  | TAG | TAG |
| F3h-B2      | ATT | TGT  | AAT | GAG | TAG  | TAG | TAG | TAG  | TAG | TAG | TAG | TAG  | TAG | TAG |
| Consensus   | ATT | TGT  | AAT | GAG | TAG  | TAG | TAG | TAG  | TAG | TAG | TAG | TAG  | TAG | TAG |
|             | 131 | 140  | 150 | 160 | 170  | 180 | 190 | 200  | 210 | 220 | 230 | 240  | 250 | 260 |
| F3h-B2-c-1  | AGG | AAT  | TTT | TTA | AAAG | TTT | TTA | TAAT | TAT | AGG | AAT | GAAT | TTT | TAT |
| F3h-B2-c-2  | AGG | AAT  | TTT | TTA | AAAG | TTT | TTA | TAAT | TAT | AGG | AAT | GAAT | TTT | TAT |
| F3h-B2-c-3  | AGG | AAT  | TTT | TTA | AAAG | TTT | TTA | TAAT | TAT | AGG | AAT | GAAT | TTT | TAT |
| F3h-B2-c-4  | AGG | AAT  | TTT | TTA | AAAG | TTT | TTA | TAAT | TAT | AGG | AAT | GAAT | TTT | TAT |
| F3h-B2-c-5  | AGG | AAT  | TTT | TTA | AAAG | TTT | TTA | TAAT | TAT | AGG | AAT | GAAT | TTT | TAT |
| F3h-B2-c-6  | AGG | AAT  | TTT | TTA | AAAG | TTT | TTA | TAAT | TAT | AGG | AAT | GAAT | TTT | TAT |
| F3h-B2-c-7  | AGG | AAT  | TTT | TTA | AAAG | TTT | TTA | TAAT | TAT | AGG | AAT | GAAT | TTT | TAT |
| F3h-B2-c-8  | AGG | AAT  | TTT | TTA | AAAG | TTT | TTA | TAAT | TAT | AGG | AAT | GAAT | TTT | TAT |
| F3h-B2-c-9  | AGG | AAT  | TTT | TTA | AAAG | TTT | TTA | TAAT | TAT | AGG | AAT | GAAT | TTT | TAT |
| F3h-B2-c-10 | AGG | AAT  | TTT | TTA | AAAG | TTT | TTA | TAAT | TAT | AGG | AAT | GAAT | TTT | TAT |
| F3h-B2      | AGG | AAT  | TTT | TTA | AAAG | TTT | TTA | TAAT | TAT | AGG | AAT | GAAT | TTT | TAT |
| Consensus   | AGG | AAT  | TTT | TTA | AAAG | TTT | TTA | TAAT | TAT | AGG | AAT | GAAT | TTT | TAT |
|             | 261 | 270  | 280 | 290 | 300  | 310 | 320 | 330  | 340 | 350 | 360 | 370  | 380 | 390 |
| F3h-B2-c-1  | TGT | GAAT | TTT | TAG | GAT  | TTT | TAG | GAT  | TTT | TAG | GAT | TTT  | TAG | GAT |
| F3h-B2-c-2  | TGT | GAAT | TTT | TAG | GAT  | TTT | TAG | GAT  | TTT | TAG | GAT | TTT  | TAG | GAT |
| F3h-B2-c-3  | TGT | GAAT | TTT | TAG | GAT  | TTT | TAG | GAT  | TTT | TAG | GAT | TTT  | TAG | GAT |
| F3h-B2-c-4  | TGT | GAAT | TTT | TAG | GAT  | TTT | TAG | GAT  | TTT | TAG | GAT | TTT  | TAG | GAT |
| F3h-B2-c-5  | TGT | GAAT | TTT | TAG | GAT  | TTT | TAG | GAT  | TTT | TAG | GAT | TTT  | TAG | GAT |
| F3h-B2-c-6  | TGT | GAAT | TTT | TAG | GAT  | TTT | TAG | GAT  | TTT | TAG | GAT | TTT  | TAG | GAT |
| F3h-B2-c-7  | TGT | GAAT | TTT | TAG | GAT  | TTT | TAG | GAT  | TTT | TAG | GAT | TTT  | TAG | GAT |
| F3h-B2-c-8  | TGT | GAAT | TTT | TAG | GAT  | TTT | TAG | GAT  | TTT | TAG | GAT | TTT  | TAG | GAT |
| F3h-B2-c-9  | TGT | GAAT | TTT | TAG | GAT  | TTT | TAG | GAT  | TTT | TAG | GAT | TTT  | TAG | GAT |
| F3h-B2-c-10 | TGT | GAAT | TTT | TAG | GAT  | TTT | TAG | GAT  | TTT | TAG | GAT | TTT  | TAG | GAT |
| F3h-B2      | TGT | GAAT | TTT | TAG | GAT  | TTT | TAG | GAT  | TTT | TAG | GAT | TTT  | TAG | GAT |
| Consensus   | TGT | GAAT | TTT | TAG | GAT  | TTT | TAG | GAT  | TTT | TAG | GAT | TTT  | TAG | GAT |
|             | 391 | 400  | 410 | 420 | 430  | 440 | 450 | 460  | 470 | 480 | 490 | 500  | 510 | 520 |
| F3h-B2-c-1  | ATT | TAG  | AT  | TTT | TGG  | TAT | TTT | TAG  | TAT | TTT | TGG | TAT  | TTT | TAG |
| F3h-B2-c-2  | ATT | TAG  | AT  | TTT | TGG  | TAT | TTT | TAG  | TAT | TTT | TGG | TAT  | TTT | TAG |
| F3h-B2-c-3  | ATT | TAG  | AT  | TTT | TGG  | TAT | TTT | TAG  | TAT | TTT | TGG | TAT  | TTT | TAG |
| F3h-B2-c-4  | ATT | TAG  | AT  | TTT | TGG  | TAT | TTT | TAG  | TAT | TTT | TGG | TAT  | TTT | TAG |
| F3h-B2-c-5  | ATT | TAG  | AT  | TTT | TGG  | TAT | TTT | TAG  | TAT | TTT | TGG | TAT  | TTT | TAG |
| F3h-B2-c-6  | ATT | TAG  | AT  | TTT | TGG  | TAT | TTT | TAG  | TAT | TTT | TGG | TAT  | TTT | TAG |
| F3h-B2-c-7  | ATT | TAG  | AT  | TTT | TGG  | TAT | TTT | TAG  | TAT | TTT | TGG | TAT  | TTT | TAG |
| F3h-B2-c-8  | ATT | TAG  | AT  | TTT | TGG  | TAT | TTT | TAG  | TAT | TTT | TGG | TAT  | TTT | TAG |
| F3h-B2-c-9  | ATT | TAG  | AT  | TTT | TGG  | TAT | TTT | TAG  | TAT | TTT | TGG | TAT  | TTT | TAG |
| F3h-B2-c-10 | ATT | TAG  | AT  | TTT | TGG  | TAT | TTT | TAG  | TAT | TTT | TGG | TAT  | TTT | TAG |
| F3h-B2      | ATT | TAG  | AT  | TTT | TGG  | TAT | TTT | TAG  | TAT | TTT | TGG | TAT  | TTT | TAG |
| Consensus   | ATT | TAG  | AT  | TTT | TGG  | TAT | TTT | TAG  | TAT | TTT | TGG | TAT  | TTT | TAG |
|             | 521 | 530  | 540 | 550 | 560  | 570 | 577 |      |     |     |     |      |     |     |
| F3h-B2-c-1  | TTT | TTT  | TAT | TAT | AT   | TAT | GAT | AT   | AT  | TAT | GAT | AT   | AT  | TAT |
| F3h-B2-c-2  | TTT | TTT  | TAT | TAT | AT   | TAT | GAT | AT   | AT  | TAT | GAT | AT   | AT  | TAT |
| F3h-B2-c-3  | TTT | TTT  | TAT | TAT | AT   | TAT | GAT | AT   | AT  | TAT | GAT | AT   | AT  | TAT |
| F3h-B2-c-4  | TTT | TTT  | TAT | TAT | AT   | TAT | GAT | AT   | AT  | TAT | GAT | AT   | AT  | TAT |
| F3h-B2-c-5  | TTT | TTT  | TAT | TAT | AT   | TAT | GAT | AT   | AT  | TAT | GAT | AT   | AT  | TAT |
| F3h-B2-c-6  | TTT | TTT  | TAT | TAT | AT   | TAT | GAT | AT   | AT  | TAT | GAT | AT   | AT  | TAT |
| F3h-B2-c-7  | TTT | TTT  | TAT | TAT | AT   | TAT | GAT | AT   | AT  | TAT | GAT | AT   | AT  | TAT |
| F3h-B2-c-8  | TTT | TTT  | TAT | TAT | AT   | TAT | GAT | AT   | AT  | TAT | GAT | AT   | AT  | TAT |
| F3h-B2-c-9  | TTT | TTT  | TAT | TAT | AT   | TAT | GAT | AT   | AT  | TAT | GAT | AT   | AT  | TAT |
| F3h-B2-c-10 | TTT | TTT  | TAT | TAT | AT   | TAT | GAT | AT   | AT  | TAT | GAT | AT   | AT  | TAT |
| F3h-B2      | TTT | TTT  | TAT | TAT | AT   | TAT | GAT | AT   | AT  | TAT | GAT | AT   | AT  | TAT |
| Consensus   | TTT | TTT  | TAT | TAT | AT   | TAT | GAT | AT   | AT  | TAT | GAT | AT   | AT  | TAT |

## Roots *TaF3H-B2*

|             | 1   | 10  | 20  | 30  | 40  | 50  | 60  | 70  | 80  | 90  | 100 | 110 | 120 | 130 |
|-------------|-----|-----|-----|-----|-----|-----|-----|-----|-----|-----|-----|-----|-----|-----|
| F3h-B2-r-1  | ATT | TG  | TAA | TG  |
| F3h-B2-r-2  | ATT | TG  | TAA | TG  |
| F3h-B2-r-3  | ATT | TG  | TAA | TG  |
| F3h-B2-r-4  | ATT | TG  | TAA | TG  |
| F3h-B2-r-10 | ATT | TG  | TAA | TG  |
| F3h-B2-r-9  | ATT | TG  | TAA | TG  |
| F3h-B2-r-8  | ATT | TG  | TAA | TG  |
| F3h-B2-r-7  | ATT | TG  | TAA | TG  |
| F3h-B2-r-6  | ATT | TG  | TAA | TG  |
| F3h-B2-r-5  | ATT | TG  | TAA | TG  |
| F3h-B2      | ATT | TG  | TAA | TG  |
| Consensus   | ATT | TG  | TAA | TG  |
|             | 131 | 140 | 150 | 160 | 170 | 180 | 190 | 200 | 210 | 220 | 230 | 240 | 250 | 260 |
| F3h-B2-r-1  | AGG | AA  | TT  |
| F3h-B2-r-2  | AGG | AA  | TT  |
| F3h-B2-r-3  | AGG | AA  | TT  |
| F3h-B2-r-4  | AGG | AA  | TT  |
| F3h-B2-r-10 | AGG | AA  | TT  |
| F3h-B2-r-9  | AGG | AA  | TT  |
| F3h-B2-r-8  | AGG | AA  | TT  |
| F3h-B2-r-7  | AGG | AA  | TT  |
| F3h-B2-r-6  | AGG | AA  | TT  |
| F3h-B2-r-5  | AGG | AA  | TT  |
| F3h-B2      | AGG | AA  | TT  |
| Consensus   | AGG | AA  | TT  |
|             | 261 | 270 | 280 | 290 | 300 | 310 | 320 | 330 | 340 | 350 | 360 | 370 | 380 | 390 |
| F3h-B2-r-1  | TG  |
| F3h-B2-r-2  | TG  |
| F3h-B2-r-3  | TG  |
| F3h-B2-r-4  | TG  |
| F3h-B2-r-10 | TG  |
| F3h-B2-r-9  | TG  |
| F3h-B2-r-8  | TG  |
| F3h-B2-r-7  | TG  |
| F3h-B2-r-6  | TG  |
| F3h-B2-r-5  | TG  |
| F3h-B2      | TG  |
| Consensus   | TG  |
|             | 391 | 400 | 410 | 420 | 430 | 440 | 450 | 460 | 470 | 480 | 490 | 500 | 510 | 520 |
| F3h-B2-r-1  | ATT | TG  |
| F3h-B2-r-2  | ATT | TG  |
| F3h-B2-r-3  | ATT | TG  |
| F3h-B2-r-4  | ATT | TG  |
| F3h-B2-r-10 | ATT | TG  |
| F3h-B2-r-9  | ATT | TG  |
| F3h-B2-r-8  | ATT | TG  |
| F3h-B2-r-7  | ATT | TG  |
| F3h-B2-r-6  | ATT | TG  |
| F3h-B2-r-5  | ATT | TG  |
| F3h-B2      | ATT | TG  |
| Consensus   | ATT | TG  |
|             | 521 | 530 | 540 | 550 | 560 | 570 | 577 |     |     |     |     |     |     |     |
| F3h-B2-r-1  | TTT |
| F3h-B2-r-2  | TTT |
| F3h-B2-r-3  | TTT |
| F3h-B2-r-4  | TTT |
| F3h-B2-r-10 | TTT |
| F3h-B2-r-9  | TTT |
| F3h-B2-r-8  | TTT |
| F3h-B2-r-7  | TTT |
| F3h-B2-r-6  | TTT |
| F3h-B2-r-5  | TTT |
| F3h-B2      | TTT |
| Consensus   | TTT |

## 5. Section S5: Results of the signal scan search request in promoters of *TaCHI* and *TaF3H* genes made with New PLACE and PlantPAN 3.0

The diagrams show the arrangement of elements in the promoter, the tables contain a description of the elements. Elements in the tables are highlighted in colors: light-dependent activation (yellow), TF-dependent elements (red), tissue- specific elements (green), stress-specific elements (blue). Sequences that correspond to methylation labels are highlighted in bold.

(+) = Current Strand  
(-) = Opposite Strand

### >TaChi-A1

AAAAGAATTGCCAGTTAAGCACAAGATAATTCCAAAAGGTTGTGATTTTACTCGTAGTACAAACAATTGGAGCTTTTCCA  
CACCTTACAAGGTGATTTCTTTAATATCGGTCTGCAGTGCACGGTGCAGTTTATGTTTATATTCTTTTTTGAACATGCA  
GTTTTAGTTTGGTGATATGTTGAGTTCCTTTTCTTTGCCAGACCGGCAGACCTGCATCGGCCAACAGCAGAGCGTCTCG  
TCTGGGCTCCTGCGTGAGTTGAATGGTAGCTCGCTTGACCTCGCCGCAAAACCTGGCGCGCGGCCACGTCCGTCTCTCAA  
CGTGCTCTCCTAACTACCACTAACCACGCCCCCAGACGCGCCCAAACTACATCTTTGCCACAAGGCACAAGTTCACCC  
CCCGTCTACCGGTAGGCCAAAGAAGTACAGGATTACGGCCGTGGCATAATCGCAATTACGGCGAGAGTCCACGGGCGTT  
TATATAGCCGCTGGGGTGTCTATATAGGAGAGAGGCCACCACCCAGCTGACCATCCCGTGCAGCCACGCTCAACAGATC  
GCACCTACCCCTGCCGGGCCGCTGCCCCATCACATCAATACAAGCGTTCTGCTCGCTACGTGCCGCTCGTCTCCGGAGACC  
CTCCGCGCACACCAGAGACCATGGCCGTGTCCGAGCTCGAGGTCGACGGCGTCTCTTCCCGCCGCTCGCCGCCGCGCGG

AAAAGAATTGCCAGTTAAGCACAAGATAATTCCAAAAGGTTGTGATTTTACTCGTAGTACAAACAATTGGAGCTTTTCCAACCTTACAAGGTGATTTCC 100  
TTTTCTTAACGGTCAATTCTGTCTCTATTAAGGTTTCCAACTATAAATGAGCATCATGTTTGTAACTCGAAAAGGTGGGATGTTCCACTAAAG  
TTTTAATATCGTCTGCAGTGCACGGTGCAGTTTATGTTTATATTCTTTTTGAAAATGCACTGAGTTTATGTTTGGTGATATGTTGAGTTCTTTCTTTTGC 200  
AAATTTATAGCCAGACGTCACTGTCACGTCCTCAAAATCAAAATATAAGAAAACTTTGTACGTCAAAATCAACCACTATACAACCTCAAGGAAAGGAAACG  
CAGACCGGCAGACCTGCATCGGCCAACAGCAGAGCGTCTCGTCTGGGCTCTGCGTGAGTTGAATGGTAGCTCGCTTGACCTCGCCGCAAAACCTGGC 300  
GTCTGGCGCTCTGGGACGTAGCCGTTGTCTGCTCGCAGAGCAGACCCGAGGACGCACTCAACTTACATCGAGCGAAGTGGAGCGGCTTTGGACCGC  
GCGCGGCACGTCCGTCTCTCAACGTGCTCTCTTAACCTACCACTAACTACGCGCCAGAGCGCGCCACAACTACATCTTTGCCACAAGGCACAAGTT 400  
CGCGCGGTGCAAGGAGGAGTTGCACGGAGAGGATTGATGGTGATTGTTGCGGGGTCTGCGCGGTGTTTGTATGTAAGAACGGTGTTCGGTGTTCAA  
CACCCCGCTCTACGCGTAGGCCAAAGAAGTACAGCAGATTACGGCGTGGCAATATCGCAATTACGGGAGAGTCCACGGGCGTTTATATAGCGCTGG 500  
GTGGGGGCGAGATGCGCATCCGGTTCTTGAATCTGCTCTAATGCCGGCACCGTATTAGCGTTAATGCCGCTCTCAGGTGCCCGCAATATATCGCGCACC  
GGTGTCTATATAGGAGAGGGCACCACCACTCAGCTGACCATCCGTGCGCCACGCTCAACAGATCGCACCTACCTGCGGGCGGCTGCCCCATC 600  
CCACAGTATATCTCTCCCGTGTGGTGGGGTCACTGGTAGGGCAGCGGGTGGCGAGTTGTCTAGCTGGATGGACGGCCCGGCGGACGGGGGTAG  
ACATCAATACAAGCGTTCTGCTCGCTACGTGCGCTCTCCGGAGACCTCCGCGACACCAGAGACCATGGCCGTGTCGAGCTCGAGGTCGACGGCGT 700  
TGTAGTTATGTTTCGCAAGCGAGCGATGACGGCAGCAGAGGCTCTGGGAGGCGCTGGTGGCTCTGGTACCGGCACAGGCTCGAGCTCCAGCTGCGCA  
CGTCTTCCCGCGCTCGCCGCCGCGCGG 800  
GCAGAAAGGCGCGAGCGGGCGGGCGGC

|                    |                    |                    |
|--------------------|--------------------|--------------------|
| TF_motif_seq_0246: | TF_motif_seq_0256: | TF_motif_seq_0257: |
| TF_motif_seq_0266: | TF_motif_seq_0312: | TF_motif_seq_0316: |
| TF_motif_seq_0327: | TF_motif_seq_0356: | TF_motif_seq_0422: |
| TF_motif_seq_0430: | TF_motif_seq_0446: | TF_motif_seq_0508: |
| TF_motif_seq_0002: | TF_motif_seq_0025: | TF_motif_seq_0037: |
| TF_motif_seq_0039: | TF_motif_seq_0068: | TF_motif_seq_0070: |
| TF_motif_seq_0238: | TF_motif_seq_0259: | TF_motif_seq_0274: |
| TF_motif_seq_0294: | TF_motif_seq_0297: | TF_motif_seq_0309: |
| TF_motif_seq_0310: | TF_motif_seq_0321: | TF_motif_seq_0333: |
| TF_motif_seq_0334: | TF_motif_seq_0343: | TF_motif_seq_0350: |
| TF_motif_seq_0353: | TF_motif_seq_0358: | TF_motif_seq_0360: |
| TF_motif_seq_0372: | TF_motif_seq_0406: | TF_motif_seq_0425: |
| TF_motif_seq_0427: | TF_motif_seq_0429: | TF_motif_seq_0436: |
| TF_motif_seq_0440: | TF_motif_seq_0454: | TF_motif_seq_0458: |
| TF_motif_seq_0488: | TF_motif_seq_0503: |                    |

| Factor or Site Name | Loc. (Str.)   | Signal Sequence | SITE #                  |
|---------------------|---------------|-----------------|-------------------------|
| DOFCOREZM           | 2 (+) AAAG    |                 | <a href="#">S000265</a> |
| EECCRAH1            | 5 (+) GANTTNC |                 | <a href="#">S000494</a> |
| CAATBOX1            | 7 (-) CAAT    |                 | <a href="#">S000028</a> |
| MYB2AT              | 13 (-) TAACTG |                 | <a href="#">S000177</a> |

|                       |         |          |                         |
|-----------------------|---------|----------|-------------------------|
| MYB2CONSENSUSAT       | 13 (-)  | YAACKG   | <a href="#">S000409</a> |
| MYBCORE               | 13 (+)  | CNGTTR   | <a href="#">S000176</a> |
| GATABOX               | 26 (+)  | GATA     | <a href="#">S000039</a> |
| GT1CONSENSUS          | 26 (+)  | GRWAAW   | <a href="#">S000198</a> |
| IBOXCORE              | 26 (+)  | GATAA    | <a href="#">S000199</a> |
| PYRIMIDINEBOXOSRAMY1A | 35 (-)  | CCTTTT   | <a href="#">S000259</a> |
| DOFCOREZM             | 36 (+)  | AAAG     | <a href="#">S000265</a> |
| GTGANTG10             | 43 (+)  | GTGA     | <a href="#">S000378</a> |
| ARR1AT                | 44 (+)  | NGATT    | <a href="#">S000454</a> |
| CACTFTPPCA1           | 50 (+)  | YACT     | <a href="#">S000449</a> |
| CACTFTPPCA1           | 57 (-)  | YACT     | <a href="#">S000449</a> |
| CURECORECR            | 58 (-)  | GTAC     | <a href="#">S000493</a> |
| CURECORECR            | 58 (+)  | GTAC     | <a href="#">S000493</a> |
| EBOXBNNA              | 65 (-)  | CANNTG   | <a href="#">S000144</a> |
| MYCCONSUSAT           | 65 (-)  | CANNTG   | <a href="#">S000407</a> |
| CAATBOX1              | 65 (+)  | CAAT     | <a href="#">S000028</a> |
| EBOXBNNA              | 65 (+)  | CANNTG   | <a href="#">S000144</a> |
| MYCCONSUSAT           | 65 (+)  | CANNTG   | <a href="#">S000407</a> |
| CAATBOX1              | 67 (-)  | CAAT     | <a href="#">S000028</a> |
| CCAATBOX1             | 67 (-)  | CCAAT    | <a href="#">S000030</a> |
| DOFCOREZM             | 74 (-)  | AAAG     | <a href="#">S000265</a> |
| GT1CONSENSUS          | 75 (-)  | GRWAAW   | <a href="#">S000198</a> |
| GTGANTG10             | 93 (+)  | GTGA     | <a href="#">S000378</a> |
| ARR1AT                | 94 (+)  | NGATT    | <a href="#">S000454</a> |
| POLLEN1LELAT52        | 97 (-)  | AGAAA    | <a href="#">S000245</a> |
| DOFCOREZM             | 100 (-) | AAAG     | <a href="#">S000265</a> |
| TAAAGSTKST1           | 100 (-) | TAAAG    | <a href="#">S000387</a> |
| ROOTMOTIFTAPOX1       | 104 (-) | ATATT    | <a href="#">S000098</a> |
| GATABOX               | 106 (-) | GATA     | <a href="#">S000039</a> |
| CACTFTPPCA1           | 117 (-) | YACT     | <a href="#">S000449</a> |
| ROOTMOTIFTAPOX1       | 141 (+) | ATATT    | <a href="#">S000098</a> |
| -10PEHVPSBD           | 142 (+) | TATTCT   | <a href="#">S000392</a> |
| DOFCOREZM             | 146 (-) | AAAG     | <a href="#">S000265</a> |
| RYREPEATBNNA          | 157 (+) | CATGCA   | <a href="#">S000264</a> |
| MYBPLANT              | 169 (-) | MACCWAMC | <a href="#">S000167</a> |
| GTGANTG10             | 174 (+) | GTGA     | <a href="#">S000378</a> |
| GATABOX               | 176 (+) | GATA     | <a href="#">S000039</a> |
| RAV1AAT               | 180 (-) | CAACA    | <a href="#">S000314</a> |
| EECCRCAH1             | 184 (+) | GANTTNC  | <a href="#">S000494</a> |
| DOFCOREZM             | 190 (-) | AAAG     | <a href="#">S000265</a> |
| DOFCOREZM             | 195 (-) | AAAG     | <a href="#">S000265</a> |
| INTRONLOWER           | 214 (-) | TGCAGG   | <a href="#">S000086</a> |
| MYBCORE               | 225 (-) | CNGTTR   | <a href="#">S000176</a> |
| RAV1AAT               | 225 (+) | CAACA    | <a href="#">S000314</a> |
| RHERPATEXPA7          | 230 (+) | KCACGW   | <a href="#">S000512</a> |
| SURECOREATSULTR11     | 238 (-) | GAGAC    | <a href="#">S000499</a> |
| SITEIIATCYTC          | 246 (+) | TGGGCY   | <a href="#">S000474</a> |
| GTGANTG10             | 257 (+) | GTGA     | <a href="#">S000378</a> |
| CAREOSREP1            | 259 (-) | CAACTC   | <a href="#">S000421</a> |
| S1FBOXSORPS1L21       | 266 (+) | ATGGTA   | <a href="#">S000223</a> |
| ELRECOREPCR1          | 278 (+) | TTGACC   | <a href="#">S000142</a> |
| WBOXATNPR1            | 278 (+) | TTGAC    | <a href="#">S000390</a> |
| QELEMENTZM13          | 279 (-) | AGGTCA   | <a href="#">S000254</a> |
| WRKY71OS              | 279 (+) | TGAC     | <a href="#">S000447</a> |
| WBOXNTERF3            | 279 (+) | TGACY    | <a href="#">S000457</a> |
| CGCGBOXAT             | 299 (-) | VCGCGB   | <a href="#">S000501</a> |
| CGCGBOXAT             | 299 (+) | VCGCGB   | <a href="#">S000501</a> |
| CGCGBOXAT             | 301 (-) | VCGCGB   | <a href="#">S000501</a> |



|                     |         |                            |                         |
|---------------------|---------|----------------------------|-------------------------|
| CGCGBBOXAT          | 301 (+) | VCGCGB                     | <a href="#">S000501</a> |
| ABREOSRAB21         | 305 (-) | ACGTSSSC                   | <a href="#">S000012</a> |
| BOXIIPCCHS          | 306 (-) | ACGTGGC                    | <a href="#">S000229</a> |
| ACGTABREMOTIFA2OSEM | 306 (-) | ACGTGKC                    | <a href="#">S000394</a> |
| SORLIP1AT           | 306 (+) | GCCAC                      | <a href="#">S000482</a> |
| ABRELATERD1         | 308 (-) | ACGTG                      | <a href="#">S000414</a> |
| ACGTATERD1          | 309 (-) | ACGT                       | <a href="#">S000415</a> |
| ACGTATERD1          | 309 (+) | ACGT                       | <a href="#">S000415</a> |
| PALBOXAPC           | 313 (+) | CCGTCC                     | <a href="#">S000137</a> |
| BP5OSWX             | 322 (+) | CAACGTG                    | <a href="#">S000436</a> |
| T/GBOXATPIN2        | 323 (+) | AACGTG                     | <a href="#">S000458</a> |
| ABRERATCAL          | 323 (+) | MACGYGB                    | <a href="#">S000507</a> |
| ACGTATERD1          | 324 (-) | ACGT                       | <a href="#">S000415</a> |
| RHERPATEXPA7        | 324 (-) | KCACGW                     | <a href="#">S000512</a> |
| ABRELATERD1         | 324 (+) | ACGTG                      | <a href="#">S000414</a> |
| ACGTATERD1          | 324 (+) | ACGT                       | <a href="#">S000415</a> |
| CACTFTPPCA1         | 343 (+) | YACT                       | <a href="#">S000449</a> |
| SV40COREENHAN       | 345 (-) | GTGGWWHG                   | <a href="#">S000123</a> |
| MYBATRD22           | 345 (+) | CTAACCA                    | <a href="#">S000175</a> |
| MYB1AT              | 346 (+) | WAACCA                     | <a href="#">S000408</a> |
| CGCGBBOXAT          | 361 (-) | VCGCGB                     | <a href="#">S000501</a> |
| CGCGBBOXAT          | 361 (+) | VCGCGB                     | <a href="#">S000501</a> |
| NODCON1GM           | 378 (-) | AAAGAT                     | <a href="#">S000461</a> |
| OSE1ROOTNODULE      | 378 (-) | AAAGAT                     | <a href="#">S000467</a> |
| DOFCOREZM           | 380 (-) | AAAG                       | <a href="#">S000265</a> |
| SORLIP1AT           | 384 (+) | GCCAC                      | <a href="#">S000482</a> |
| GTGANTG10           | 400 (-) | GTGA                       | <a href="#">S000378</a> |
| CGCGBBOXAT          | 413 (-) | VCGCGB                     | <a href="#">S000501</a> |
| CGCGBBOXAT          | 413 (+) | VCGCGB                     | <a href="#">S000501</a> |
| DOFCOREZM           | 424 (+) | AAAG                       | <a href="#">S000265</a> |
| PRECONSCRHSP70A     | 437 (-) | SCGAYNRNNNNNNNNNNNNNNNNHND | <a href="#">S000506</a> |
| ARR1AT              | 437 (+) | NGATT                      | <a href="#">S000454</a> |
| SORLIP1AT           | 448 (-) | GCCAC                      | <a href="#">S000482</a> |
| ARR1AT              | 455 (-) | NGATT                      | <a href="#">S000454</a> |
| CAATBOX1            | 460 (+) | CAAT                       | <a href="#">S000028</a> |
| TATAPVTRNALEU       | 485 (+) | TTTATATA                   | <a href="#">S000340</a> |
| TATABOX4            | 486 (-) | TATATAA                    | <a href="#">S000111</a> |
| BIHD1OS             | 503 (+) | TGTCA                      | <a href="#">S000498</a> |
| WRKY71OS            | 504 (-) | TGAC                       | <a href="#">S000447</a> |
| EBOXBNNAPA          | 531 (-) | CANNTG                     | <a href="#">S000144</a> |
| MYCCONSENSUSAT      | 531 (-) | CANNTG                     | <a href="#">S000407</a> |
| EBOXBNNAPA          | 531 (+) | CANNTG                     | <a href="#">S000144</a> |
| MYCCONSENSUSAT      | 531 (+) | CANNTG                     | <a href="#">S000407</a> |
| WBOXNTCHN48         | 534 (+) | CTGACY                     | <a href="#">S000508</a> |
| WRKY71OS            | 535 (+) | TGAC                       | <a href="#">S000447</a> |
| WBOXNTERF3          | 535 (+) | TGACY                      | <a href="#">S000457</a> |
| BOXLCOREDPCAL       | 537 (+) | ACCWWCC                    | <a href="#">S000492</a> |
| MYBCORE             | 559 (-) | CNGTTR                     | <a href="#">S000176</a> |
| RAV1AAT             | 559 (+) | CAACA                      | <a href="#">S000314</a> |
| MYBPLANT            | 569 (+) | MACCWAMC                   | <a href="#">S000167</a> |
| BOXLCOREDPCAL       | 570 (+) | ACCWWCC                    | <a href="#">S000492</a> |
| MYBPZM              | 571 (+) | CCWACC                     | <a href="#">S000179</a> |
| SORLIP2AT           | 582 (+) | GGGCC                      | <a href="#">S000483</a> |
| GTGANTG10           | 599 (-) | GTGA                       | <a href="#">S000378</a> |
| CAATBOX1            | 605 (+) | CAAT                       | <a href="#">S000028</a> |
| ACGTATERD1          | 626 (-) | ACGT                       | <a href="#">S000415</a> |
| RHERPATEXPA7        | 626 (-) | KCACGW                     | <a href="#">S000512</a> |
| ABRELATERD1         | 626 (+) | ACGTG                      | <a href="#">S000414</a> |
| ACGTATERD1          | 626 (+) | ACGT                       | <a href="#">S000415</a> |

|                   |         |         |                         |
|-------------------|---------|---------|-------------------------|
| HEXAMERATH4       | 631 (+) | CCGTCG  | <a href="#">S000146</a> |
| CGACGOSAMY3       | 632 (-) | CGACG   | <a href="#">S000205</a> |
| SURECOREATSULTR11 | 636 (-) | GAGAC   | <a href="#">S000499</a> |
| SURECOREATSULTR11 | 643 (+) | GAGAC   | <a href="#">S000499</a> |
| CGCGBOXAT         | 651 (-) | VCGCGB  | <a href="#">S000501</a> |
| CGCGBOXAT         | 651 (+) | VCGCGB  | <a href="#">S000501</a> |
| DRE1COREZMRAB17   | 660 (+) | ACCGAGA | <a href="#">S000401</a> |
| SURECOREATSULTR11 | 663 (+) | GAGAC   | <a href="#">S000499</a> |
| CRTDREHVCBF2      | 690 (-) | GTCGAC  | <a href="#">S000411</a> |
| CBFHV             | 690 (-) | RYCGAC  | <a href="#">S000497</a> |
| CRTDREHVCBF2      | 690 (+) | GTCGAC  | <a href="#">S000411</a> |
| CBFHV             | 690 (+) | RYCGAC  | <a href="#">S000497</a> |
| HEXAMERATH4       | 692 (-) | CCGTCCG | <a href="#">S000146</a> |
| CGACGOSAMY3       | 692 (+) | CGACG   | <a href="#">S000205</a> |
| CGACGOSAMY3       | 698 (-) | CGACG   | <a href="#">S000205</a> |
| //                |         |         |                         |

#### >TaChi-B1

CGGACCCAAACGGACAAAAAGCGAACAAAATCACCGTCCGTTTGGGTCGGCACCGTTGGAGTTGCTCTAATCCTTATTAAT  
TCATGCCTGAGGTAGGCGGAACATTACTCTTGCCCTACCCCGTAGGGTGGTTTCTTTTGGATCGGTGTGCTTTGGTGACAT  
GTTGAGCCGTTGTGTCTGGTGTGGGCTCGTGCGTGAGTTGAATGGTAGCTTGACGTCGCCGCAAAACCTGGCGCGCGGCCA  
CGTCCGTCCTCTCTTTGCCCTCAACGTGCCTCTCCCAACTACCCTAACACGCCCCCATATGCGCACACAACTACATC  
TTTGCCACAAGGCACAAGGTCCACCTCCGTTACCGTCTAGTCTAGGCCGCGTAGGCCAGAGAACCAGACCAGATTACAGC  
CGTGGCACAATCGCAATTACGGGCAGAGTGTACGGGCGTTTATATAGCTGTTGCGGTGTCTATAGGGGGGGGCACGCACCA  
CCACCCAGCTACCCATCCCGTGCGCCACGCCCTCGCCAGATCGCACCTACCTGCGGCCCTGCCCGCGTCCCATCAATAC  
AAGTGTTTGTCTCGCTACGTGCCGTCCGTCTCTCCGAGACCTCCATCCATCCATCCGGCGATATACC

CGGACCCAAACGGACAAAAAGCGAACAAAATCACCGTCCGTTTGGGTCGGCACCGTTGGAGTTGCTCTAATCCTTATTAATT  
CATGCCTGAGGTAGGCGGAACATTACTCTTGCCCTACCCCGTAGGGTGGTTTCTTTTGGATCGGTGTGCTTTGGTGACAT  
GTTGAGCCGTTGTGTCTGGTGTGGGCTCGTGCGTGAGTTGAATGGTAGCTTGACGTCGCCGCAAAACCTGGCGCGCGGCCA  
CGTCCGTCCTCTCTTTGCCCTCAACGTGCCTCTCCCAACTACCCTAACACGCCCCCATATGCGCACACAACTACATC  
TTTGCCACAAGGCACAAGGTCCACCTCCGTTACCGTCTAGTCTAGGCCGCGTAGGCCAGAGAACCAGACCAGATTACAGC  
CGTGGCACAATCGCAATTACGGGCAGAGTGTACGGGCGTTTATATAGCTGTTGCGGTGTCTATAGGGGGGGGCACGCACCA  
CCACCCAGCTACCCATCCCGTGCGCCACGCCCTCGCCAGATCGCACCTACCTGCGGCCCTGCCCGCGTCCCATCAATAC  
AAGTGTTTGTCTCGCTACGTGCCGTCCGTCTCTCCGAGACCTCCATCCATCCATCCGGCGATATACC

CGGACCCAAACGGACAAAAAGCGAACAAAATCACCGTCCGTTTGGGTCGGCACCGTTGGAGTTGCTCTAATCCTTATTAATT  
CATGCCTGAGGTAGGCGGAACATTACTCTTGCCCTACCCCGTAGGGTGGTTTCTTTTGGATCGGTGTGCTTTGGTGACAT  
GTTGAGCCGTTGTGTCTGGTGTGGGCTCGTGCGTGAGTTGAATGGTAGCTTGACGTCGCCGCAAAACCTGGCGCGCGGCCA  
CGTCCGTCCTCTCTTTGCCCTCAACGTGCCTCTCCCAACTACCCTAACACGCCCCCATATGCGCACACAACTACATC  
TTTGCCACAAGGCACAAGGTCCACCTCCGTTACCGTCTAGTCTAGGCCGCGTAGGCCAGAGAACCAGACCAGATTACAGC  
CGTGGCACAATCGCAATTACGGGCAGAGTGTACGGGCGTTTATATAGCTGTTGCGGTGTCTATAGGGGGGGGCACGCACCA  
CCACCCAGCTACCCATCCCGTGCGCCACGCCCTCGCCAGATCGCACCTACCTGCGGCCCTGCCCGCGTCCCATCAATAC  
AAGTGTTTGTCTCGCTACGTGCCGTCCGTCTCTCCGAGACCTCCATCCATCCATCCGGCGATATACC

AACATTACTCTTGCCCTACCCGTTAGGGTGGTTTCTTTTGGATCGGTGTGCTTTGGTGACATGTTGAGCCGTTGTCTGGTGTGGGCT  
CGTGCCTGAGT  
TTGTAATGAGAACGGATGGCGCATCCACCAAGAACTCTAGCCACACGAAACCTGTACAACTCGGCAACACAGACACACCCGAGCAGGCATCA  
\*\*\*\*\*

TGAATGGTAGCTTGAAGTCGCGCAAAACCTGGCGCGCGCCACGTCCGTCCTCTCTTGCCCTCAACGTGCTCTCCCAACTACCACTAACACGCCCC  
ACTTACCATCGAATCGAGCGCGCTTTGGACCGCGCGCGGTGCAAGCAGGAGAGAAACGGGAGTTGACGAGAGAGGGTTGATGGTGATTGGTGGCGG  
\*\*\*\*\*

CCATATGCGCACACAACTACATCTTTGCCACAAGGCACAAGGTCCACCTCCGTTACCGTCTAGTCTAGGCCGCGTAGGCCAGAGAACCAGACCAGATT  
GGTATACCGGTGTGTTTGTAGTGAAGACGGTGTTCCGTGTTCCAGGTGGGAGGCAATGGCAGATCAGATCCCGCGCATCCGGTCTCTTGGTCTGGTCTAA  
\*\*\*\*\*

ACAGCGTGGCACAATCGCAATTACGGGCAGAGTGTACGGGCGTTTATATAGCTGTTGCGGTGTCTATAGGGGGGGGCACGCACCAACCACCCAGCTAC  
TTGTCGGCACCGTGTTAGCGTTAATGCCGCTCTCACATGCCGCAATATATCGACAACGCCACAGTATATCCCGCCGTGCGTGGTGGGGTTCGATGG  
\*\*\*\*\*

CATCCCGTGGCGCCACGCTCGCCAGATCGCACCTACCTGCGGCCCTGCCCGCTCCCATCAATACAAGTGTTTGTCTGCTACGTGCCGTCCGTCGTCT  
GTAGGCAACCGCGGTGCGGAGCGGTCTAGCTGGATGGGACGGCGGACGGGGCAGGGTAGTTATGTTCAACAACGAGCGATGCACGGCAGGCAGAGA  
\*\*\*\*\*

CCGAGACCTCCATCCATCCATCCGCGATATACC  
GGCCCTCGGGAGGTAGGTAGTAGCGCGTATATGG  
\*\*\*\*\*

|                    |  |                    |  |                    |  |
|--------------------|--|--------------------|--|--------------------|--|
| TF_motif_seq_0246: |  | TF_motif_seq_0256: |  | TF_motif_seq_0257: |  |
| TF_motif_seq_0266: |  | TF_motif_seq_0292: |  | TF_motif_seq_0312: |  |
| TF_motif_seq_0316: |  | TF_motif_seq_0327: |  | TF_motif_seq_0347: |  |
| TF_motif_seq_0422: |  | TF_motif_seq_0431: |  | TF_motif_seq_0446: |  |
| TF_motif_seq_0508: |  | TF_motif_seq_0002: |  | TF_motif_seq_0025: |  |
| TF_motif_seq_0031: |  | TF_motif_seq_0037: |  | TF_motif_seq_0039: |  |
| TF_motif_seq_0068: |  | TF_motif_seq_0121: |  | TF_motif_seq_0132: |  |
| TF_motif_seq_0238: |  | TF_motif_seq_0259: |  | TF_motif_seq_0274: |  |
| TF_motif_seq_0283: |  | TF_motif_seq_0297: |  | TF_motif_seq_0310: |  |
| TF_motif_seq_0324: |  | TF_motif_seq_0334: |  | TF_motif_seq_0344: |  |
| TF_motif_seq_0353: |  | TF_motif_seq_0358: |  | TF_motif_seq_0360: |  |
| TF_motif_seq_0372: |  | TF_motif_seq_0380: |  | TF_motif_seq_0406: |  |
| TF_motif_seq_0425: |  | TF_motif_seq_0427: |  | TF_motif_seq_0429: |  |
| TF_motif_seq_0440: |  | TF_motif_seq_0454: |  | TF_motif_seq_0458: |  |
| TF_motif_seq_0488: |  | TF_motif_seq_0503: |  |                    |  |

| Factor or Site Name | Loc. (Str.)  | Signal Sequence | SITE #                  |
|---------------------|--------------|-----------------|-------------------------|
| MYBCOREATCYCB1      | 9 (+) AACGG  |                 | <a href="#">S000502</a> |
| DOFCOREZM           | 18 (+) AAAG  |                 | <a href="#">S000265</a> |
| ARR1AT              | 29 (-) NGATT |                 | <a href="#">S000454</a> |

|                     |                  |         |
|---------------------|------------------|---------|
| GTGANTG10           | 31 (-) GTGA      | S000378 |
| PALBOXAPC           | 34 (+) CCGTCC    | S000137 |
| MYBCOREATCYCB1      | 38 (-) AACGG     | S000502 |
| LTRECOREATCOR15     | 46 (-) CCGAC     | S000153 |
| DRECRTCOREAT        | 46 (-) RCCGAC    | S000418 |
| CBFHV               | 46 (-) RYCGAC    | S000497 |
| MYB2CONSENSUSAT     | 53 (-) YAACKG    | S000409 |
| MYBCOREATCYCB1      | 53 (-) AACGG     | S000502 |
| MYBCORE             | 53 (+) CNGTTR    | S000176 |
| CAREOSREP1          | 59 (-) CAACTC    | S000421 |
| EECCRCAH1           | 59 (+) GANTTNC   | S000494 |
| ARR1AT              | 69 (-) NGATT     | S000454 |
| TATABOX3            | 75 (+) TATTAAT   | S000110 |
| MYBPZM              | 92 (-) CCWACC    | S000179 |
| CACTFTPPCA1         | 106 (+) YACT     | S000449 |
| NODCON2GM           | 108 (+) CTCTT    | S000462 |
| OSE2ROOTNODULE      | 108 (+) CTCTT    | S000468 |
| MYBPZM              | 114 (+) CCWACC   | S000179 |
| MYB1AT              | 128 (-) WAACCA   | S000408 |
| POLLEN1LELAT52      | 131 (-) AGAAA    | S000245 |
| DOFCOREZM           | 134 (-) AAAG     | S000265 |
| DOFCOREZM           | 151 (-) AAAG     | S000265 |
| GTGANTG10           | 156 (+) GTGA     | S000378 |
| BIHD1OS             | 157 (-) TGTCA    | S000498 |
| WRKY71OS            | 157 (+) TGAC     | S000447 |
| RAV1AAT             | 162 (-) CAACA    | S000314 |
| MYB2CONSENSUSAT     | 169 (-) YAACKG   | S000409 |
| MYBCOREATCYCB1      | 169 (-) AACGG    | S000502 |
| MYBCORE             | 169 (+) CNGTTR   | S000176 |
| DPBFCOREDCDC3       | 178 (-) ACACNNG  | S000292 |
| SITEIIATCYTC        | 184 (+) TGGGCY   | S000474 |
| RHERPATExPA7        | 189 (-) KCACGW   | S000512 |
| GTGANTG10           | 195 (+) GTGA     | S000378 |
| CAREOSREP1          | 197 (-) CAACTC   | S000421 |
| S1FBOXSORPS1L21     | 204 (+) ATGGTA   | S000223 |
| WBOXATNPR1          | 212 (+) TTGAC    | S000390 |
| HEXMOTIFTAH3H4      | 213 (-) ACGTCA   | S000053 |
| ASF1MOTIFCAMV       | 213 (+) TGACG    | S000024 |
| TGACGTVMAMY         | 213 (+) TGACGT   | S000377 |
| WRKY71OS            | 213 (+) TGAC     | S000447 |
| ACGTCBOX            | 214 (-) GACGTC   | S000131 |
| ACGTCBOX            | 214 (+) GACGTC   | S000131 |
| ACGTATERD1          | 215 (-) ACGT     | S000415 |
| ABREOSRAB21         | 215 (+) ACGTSSSC | S000012 |
| ACGTATERD1          | 215 (+) ACGT     | S000415 |
| CGACGOSAMY3         | 216 (-) CGACG    | S000205 |
| CGCGBOXAT           | 233 (-) VCGCGB   | S000501 |
| CGCGBOXAT           | 233 (+) VCGCGB   | S000501 |
| CGCGBOXAT           | 235 (-) VCGCGB   | S000501 |
| CGCGBOXAT           | 235 (+) VCGCGB   | S000501 |
| ABREOSRAB21         | 239 (-) ACGTSSSC | S000012 |
| BOXIIPCCHS          | 240 (-) ACGTGCC  | S000229 |
| ACGTABREMOTIFA2OSEM | 240 (-) ACGTGKC  | S000394 |
| SORLIP1AT           | 240 (+) GCCAC    | S000482 |
| ABRELATERD1         | 242 (-) ACGTG    | S000414 |
| ACGTATERD1          | 243 (-) ACGT     | S000415 |
| ACGTATERD1          | 243 (+) ACGT     | S000415 |
| PALBOXAPC           | 247 (+) CCGTCC   | S000137 |
| NODCON2GM           | 254 (+) CTCTT    | S000462 |

|                 |         |                          |         |
|-----------------|---------|--------------------------|---------|
| OSE2ROOTNODULE  | 254 (+) | CTCTT                    | S000468 |
| DOFCOREZM       | 256 (-) | AAAG                     | S000265 |
| E2FCONSENSUS    | 257 (+) | WTTSSCSS                 | S000476 |
| BP5OSWX         | 266 (+) | CAACGTG                  | S000436 |
| T/GBOXATPIN2    | 267 (+) | AACGTG                   | S000458 |
| ABRERATCAL      | 267 (+) | MACGYGB                  | S000507 |
| ACGTATERD1      | 268 (-) | ACGT                     | S000415 |
| RHERPATEXPA7    | 268 (-) | KCACGW                   | S000512 |
| ABRELATERD1     | 268 (+) | ACGTG                    | S000414 |
| ACGTATERD1      | 268 (+) | ACGT                     | S000415 |
| UPRMOTIFIIAT    | 279 (+) | CCNNNNNNNNNNNNNCCACG     | S000426 |
| CACTFTPPCA1     | 287 (+) | YACT                     | S000449 |
| SV40CORENHAN    | 289 (-) | GTGGWWHG                 | S000123 |
| MYBATRD22       | 289 (+) | CTAACCA                  | S000175 |
| MYB1AT          | 290 (+) | WAACCA                   | S000408 |
| EBOXBNNAPA      | 302 (-) | CANNTG                   | S000144 |
| CATATGGMSAUR    | 302 (-) | CATATG                   | S000370 |
| MYCCONSENSUSAT  | 302 (-) | CANNTG                   | S000407 |
| EBOXBNNAPA      | 302 (+) | CANNTG                   | S000144 |
| CATATGGMSAUR    | 302 (+) | CATATG                   | S000370 |
| MYCCONSENSUSAT  | 302 (+) | CANNTG                   | S000407 |
| NODCON1GM       | 322 (-) | AAAGAT                   | S000461 |
| OSE1ROOTNODULE  | 322 (-) | AAAGAT                   | S000467 |
| DOFCOREZM       | 324 (-) | AAAG                     | S000265 |
| SORLIP1AT       | 328 (+) | GCCAC                    | S000482 |
| MYB2CONSENSUSAT | 352 (-) | YAACKG                   | S000409 |
| MYBCOREATCYCB1  | 352 (-) | AACGG                    | S000502 |
| MYBCORE         | 352 (+) | CNGTTR                   | S000176 |
| CGCGBOXAT       | 372 (-) | VCGCGB                   | S000501 |
| CGCGBOXAT       | 372 (+) | VCGCGB                   | S000501 |
| PRECONSCRHSP70A | 396 (-) | SCGAYNRNNNNNNNNNNNNNNHND | S000506 |
| ARR1AT          | 396 (+) | NGATT                    | S000454 |
| SORLIP1AT       | 407 (-) | GCCAC                    | S000482 |
| CAATBOX1        | 413 (+) | CAAT                     | S000028 |
| ARR1AT          | 414 (-) | NGATT                    | S000454 |
| CAATBOX1        | 419 (+) | CAAT                     | S000028 |
| CACTFTPPCA1     | 432 (-) | YACT                     | S000449 |
| CURECORECR      | 435 (-) | GTAC                     | S000493 |
| CURECORECR      | 435 (+) | GTAC                     | S000493 |
| TATAPVTRNALEU   | 444 (+) | TTTATATA                 | S000340 |
| TATABOX4        | 445 (-) | TATATAA                  | S000111 |
| MYBCORE         | 453 (+) | CNGTTR                   | S000176 |
| RAV1AAT         | 454 (-) | CAACA                    | S000314 |
| BIHD1OS         | 462 (+) | TGTCA                    | S000498 |
| WRKY71OS        | 463 (-) | TGAC                     | S000447 |
| UPRMOTIFIIAT    | 499 (+) | CCNNNNNNNNNNNNNCCACG     | S000426 |
| MYBPLANT        | 531 (+) | MACCWAMC                 | S000167 |
| BOXLCOREDCPAL   | 532 (+) | ACCWWCC                  | S000492 |
| MYBPZM          | 533 (+) | CCWACC                   | S000179 |
| GCCORE          | 541 (+) | GCCGCC                   | S000430 |
| PALBOXAPC       | 553 (+) | CCGTCC                   | S000137 |
| CAATBOX1        | 562 (+) | CAAT                     | S000028 |
| EBOXBNNAPA      | 567 (-) | CANNTG                   | S000144 |
| DPBFCOREDCDC3   | 567 (-) | ACACNNG                  | S000292 |
| MYCCONSENSUSAT  | 567 (-) | CANNTG                   | S000407 |
| EBOXBNNAPA      | 567 (+) | CANNTG                   | S000144 |
| MYCCONSENSUSAT  | 567 (+) | CANNTG                   | S000407 |
| CACTFTPPCA1     | 569 (-) | YACT                     | S000449 |





|                     |         |            |         |
|---------------------|---------|------------|---------|
| MYBCORE             | 39 (+)  | CNGTTR     | S000176 |
| RAV1AAT             | 40 (-)  | CAACA      | S000314 |
| CACTFTPPCA1         | 57 (-)  | YACT       | S000449 |
| SEF4MOTIFGM7S       | 70 (+)  | RTTTTTTR   | S000103 |
| ANAERO1CONSENSUS    | 73 (-)  | AAACAAA    | S000477 |
| SEF4MOTIFGM7S       | 76 (+)  | RTTTTTTR   | S000103 |
| ANAERO1CONSENSUS    | 79 (-)  | AAACAAA    | S000477 |
| INRNTPSADB          | 95 (+)  | YTCANTYY   | S000395 |
| MYBPLANT            | 105 (-) | MACCWAMC   | S000167 |
| GTGANTG10           | 110 (+) | GTGA       | S000378 |
| GATABOX             | 112 (+) | GATA       | S000039 |
| RAV1AAT             | 116 (-) | CAACA      | S000314 |
| EECCRCAH1           | 120 (+) | GANTTNC    | S000494 |
| DOFCOREZM           | 126 (-) | AAAG       | S000265 |
| DOFCOREZM           | 131 (-) | AAAG       | S000265 |
| TAAAGSTKST1         | 131 (-) | TAAAG      | S000387 |
| GT1CONSENSUS        | 132 (-) | GRWAAW     | S000198 |
| INTRONLOWER         | 150 (-) | TGCAGG     | S000086 |
| RAV1AAT             | 164 (+) | CAACA      | S000314 |
| DPBFCOREDCDC3       | 166 (+) | ACACNNG    | S000292 |
| DPBFCOREDCDC3       | 169 (-) | ACACNNG    | S000292 |
| CACTFTPPCA1         | 171 (-) | YACT       | S000449 |
| RHERPATEXPA7        | 187 (-) | KCACGW     | S000512 |
| GTGANTG10           | 193 (+) | GTGA       | S000378 |
| MARTBOX             | 198 (+) | TTWTWTTWTT | S000067 |
| MARTBOX             | 199 (+) | TTWTWTTWTT | S000067 |
| MARTBOX             | 200 (+) | TTWTWTTWTT | S000067 |
| MARTBOX             | 201 (+) | TTWTWTTWTT | S000067 |
| MARTBOX             | 202 (+) | TTWTWTTWTT | S000067 |
| MARTBOX             | 203 (+) | TTWTWTTWTT | S000067 |
| RHERPATEXPA7        | 220 (-) | KCACGW     | S000512 |
| GTGANTG10           | 226 (+) | GTGA       | S000378 |
| CAREOSREP1          | 228 (-) | CAACTC     | S000421 |
| S1FBOXSORPS1L21     | 235 (+) | ATGGTA     | S000223 |
| ELRECOREPCR1        | 243 (+) | TTGACC     | S000142 |
| WBOXATNPR1          | 243 (+) | TTGAC      | S000390 |
| QELEMENTZMZM13      | 244 (-) | AGGTCA     | S000254 |
| WRKY71OS            | 244 (+) | TGAC       | S000447 |
| WBOXNTERF3          | 244 (+) | TGACY      | S000457 |
| CGCGBOXAT           | 264 (-) | VCGCGB     | S000501 |
| CGCGBOXAT           | 264 (+) | VCGCGB     | S000501 |
| CGCGBOXAT           | 266 (-) | VCGCGB     | S000501 |
| CGCGBOXAT           | 266 (+) | VCGCGB     | S000501 |
| ACGTABREMOTIFA2OSEM | 271 (-) | ACGTGKC    | S000394 |
| GADOWNAT            | 271 (-) | ACGTGTC    | S000438 |
| ABRELATERD1         | 273 (-) | ACGTG      | S000414 |
| ACGTATERD1          | 274 (-) | ACGT       | S000415 |
| ACGTATERD1          | 274 (+) | ACGT       | S000415 |
| BP5OSWX             | 293 (+) | CAACGTG    | S000436 |
| T/GBOXATPIN2        | 294 (+) | AACGTG     | S000458 |
| ABRERATCAL          | 294 (+) | MACGYGB    | S000507 |
| ACGTATERD1          | 295 (-) | ACGT       | S000415 |
| RHERPATEXPA7        | 295 (-) | KCACGW     | S000512 |
| ABRELATERD1         | 295 (+) | ACGTG      | S000414 |
| ACGTATERD1          | 295 (+) | ACGT       | S000415 |
| CACTFTPPCA1         | 314 (+) | YACT       | S000449 |
| SV40COREENHAN       | 316 (-) | GTGGWWHG   | S000123 |
| MYBATRD22           | 316 (+) | CTAACCA    | S000175 |

|                   |         |                          |         |
|-------------------|---------|--------------------------|---------|
| MYB1AT            | 317 (+) | WAACCA                   | S000408 |
| EBOXBNNAPA        | 329 (-) | CANNTG                   | S000144 |
| MYCCONSENSUSAT    | 329 (-) | CANNTG                   | S000407 |
| EBOXBNNAPA        | 329 (+) | CANNTG                   | S000144 |
| MYCCONSENSUSAT    | 329 (+) | CANNTG                   | S000407 |
| SORLIP1AT         | 355 (+) | GCCAC                    | S000482 |
| ASF1MOTIFCAMV     | 379 (-) | TGACG                    | S000024 |
| WRKY71OS          | 380 (-) | TGAC                     | S000447 |
| GTGANTG10         | 381 (-) | GTGA                     | S000378 |
| CGCGBOXAT         | 398 (-) | VCGCGB                   | S000501 |
| CGCGBOXAT         | 398 (+) | VCGCGB                   | S000501 |
| PRECONSCRHSP70A   | 422 (-) | SCGAYNRNNNNNNNNNNNNNNNNH | S000506 |
| ARR1AT            | 422 (+) | NGATT                    | S000454 |
| SORLIP1AT         | 433 (-) | GCCAC                    | S000482 |
| ARR1AT            | 440 (-) | NGATT                    | S000454 |
| CAATBOX1          | 445 (+) | CAAT                     | S000028 |
| CRTDREHVCBF2      | 459 (-) | GTCGAC                   | S000411 |
| CBFHV             | 459 (-) | RYCGAC                   | S000497 |
| CRTDREHVCBF2      | 459 (+) | GTCGAC                   | S000411 |
| CBFHV             | 459 (+) | RYCGAC                   | S000497 |
| HEXAMERATH4       | 461 (-) | CCGTCG                   | S000146 |
| CGACGOSAMY3       | 461 (+) | CGACG                    | S000205 |
| TATAPVTRNALEU     | 470 (+) | TTTATATA                 | S000340 |
| TATABOX4          | 471 (-) | TATATAA                  | S000111 |
| MYBCORE           | 479 (+) | CNGTTR                   | S000176 |
| RAV1AAT           | 480 (-) | CAACA                    | S000314 |
| BIHD1OS           | 488 (+) | TGTCA                    | S000498 |
| WRKY71OS          | 489 (-) | TGAC                     | S000447 |
| MYBPLANT          | 557 (+) | MACCWAMC                 | S000167 |
| BOXLCOREDPCAL     | 558 (+) | ACCWWCC                  | S000492 |
| MYBPZM            | 559 (+) | CCWACC                   | S000179 |
| GTGANTG10         | 582 (-) | GTGA                     | S000378 |
| CAATBOX1          | 588 (+) | CAAT                     | S000028 |
| EBOXBNNAPA        | 593 (-) | CANNTG                   | S000144 |
| DPBFCOREDCDC3     | 593 (-) | ACACNNG                  | S000292 |
| MYCCONSENSUSAT    | 593 (-) | CANNTG                   | S000407 |
| EBOXBNNAPA        | 593 (+) | CANNTG                   | S000144 |
| MYCCONSENSUSAT    | 593 (+) | CANNTG                   | S000407 |
| CACTFTPPCA1       | 595 (-) | YACT                     | S000449 |
| CANBNNAPA         | 596 (-) | CNAACAC                  | S000148 |
| ACGTATERD1        | 609 (-) | ACGT                     | S000415 |
| RHERPATExPA7      | 609 (-) | KCACGW                   | S000512 |
| ABRELATERD1       | 609 (+) | ACGTG                    | S000414 |
| ACGTATERD1        | 609 (+) | ACGT                     | S000415 |
| HEXAMERATH4       | 614 (+) | CCGTCG                   | S000146 |
| CGACGOSAMY3       | 615 (-) | CGACG                    | S000205 |
| SURECOREATSULTR11 | 619 (-) | GAGAC                    | S000499 |
| SURECOREATSULTR11 | 626 (+) | GAGAC                    | S000499 |
| //                |         |                          |         |

# >TaF3H-B1

TCTACAAGCCATGGAAATATGACGTGTCATGATGTATAGGTTTTAGATATTGGGCGAACCAATCTGTGGTTGGATGGTTAA  
AGGGACTCTGATATCCCCAGTCCACTAAGGTTCAAATCTGGTGCTTGAGTTTATTCCTGGATTATTTTCAGGATTTTCGACG  
ATGTGCATTTCAGTAGGAGAAGACGTTCCCGTCGACAACGAGTTGCCACGATGACTTCGTAAATTTCAAGATAATATGCCG  
ATTCGGTCTTTTCGGAGGTGCTCATAGGGGTAGGGTGTGCGTGTGTGCGTTTATAGGGATGAGTGTATGCACGTATATATGA  
GCGCTTGATCTGGACTGTGTTAAAAAAAGTTCTAGATCTTGGTTGGTGTATAGCGGGTGTCCAGTGGTGTGTGTGCTTG  
TGATGTGTGTGTTGTGCGTATATGGATCGATCGATACGGCTGGATGGATGCATGGGTGCGGCCCCGGTTAGTTGCGCACCTA  
ACACGAGTGCCCCGAGGGCGACTTTCCTTGTTAGTTGCGTGCGCACGCGCGACTTGCAGGTGCGGTCTGCCCTCATCTTCC

AACGTTAGTATACACAATGCCCTCTTCCCGGCCGTATATATCCGCGTGCGTACAACGTCCAGAAAACCACAACCCAAACGGC  
CGAGCCTTTTCATCAAGGAACAAACCATCATACGAGACAGACGCCGCGCGACACAAGCGGACGATCCCCGGAGTGCGGAT  
CGATGGCGCCCGGTGAGCAACGAGACGTTCTCTCCCGA

TCTACAAGCCATGGAATATGACGTGCTATGATGTATAGTTTTAGATATTGGGCGAACCAATCTGTGGTTGGATGTTAAAGGGACTCTGATATCCCA 100  
AGATGTTTCGGTACCTTTATCTGCACAGTACTACATATCCAAAATCTATAACCCGCTTGGTTAGACACCAACCCTACCAATTTCCCTGAGACTATAGGGT  
\*\*\*\*\*  
GTCCACTAAGGTTCAAACTGTGGTCTTATCTCTGGATTAATTTCAAGGATTTTTCGACGATGTGCAATTCAGTAGGAGAAGACGTTCCCGTCGACAAAC 200  
CAGGTGATTTCCAAGTTTAGACCACGAACCTAAATAAGGACCTAATAAAGTCCATAAAGCTGCTACACGTAAGTCATCTCTCTGCAAGGGCAGCTGTTG  
\*\*\*\*\*  
GAGTTGCGCCACGATGACTTCGTAATTTCAAGATAATATGCCGATTCTGCTCTTTCGAGGTTGCTCATAGGGGTAGGGTGTGCGTGTGTGCGTTTATAGGG 300  
CTCAACGGGTGCTACTGAAGCATTTAAAGTTCTATTATACGGCTAAGCCAGAAAGCCTCCACGAGTATCCCATCCACACGCAACACGCAATATCCG  
\*\*\*\*\*  
ATGAGTGTATGCACGTATATATGAGCGCTTGTATCTGGAAGTGTATAAAAAAGTTCTAGATCTTGGTTGGTGTATAGCGGGTGTCCAGTGGTGTGTGT 400  
TACTCACATACGTGCATATATATACTCGCAACATAGACCTGACACAAATTTTTTTTCAAGATCTAGAACCACACATATCGCCACAGGTCAACACACACA  
\*\*\*\*\*  
GCTTGTGATGTGTGTGTGTGCGTATATGGATCGATCGATACGGCTGGATGGATGCATGGGTGCGGCCCGGTTAGTTGCGCACCTAACACAGTGCCTCGA 500  
CGAACACTACACACACAACACGCATATACCTAGCTAGCTATGCGGACCTACCTACGTACCCACGCCGGGCAATCAACGCGTGGATTGTGCTACGGGCT  
\*\*\*\*\*  
GGGCGACTTCCTTGGTTAGTTGCGTGCACGCGCGACTTGCAGGTGCGCTCTGCCCCCTCATCTTCAACGTAGTATACACAATGCCCTCTTCCCGCGCG 600  
CCGCTGAAGGAACTAATCAACGCACGCTGCGCGCTGAACGTCCAGCGCAGACGGGAGTAGAAGGTTGCATCATATGTGTTACGGGAGAAAGGCGCGC  
\*\*\*\*\*  
TATATATCCCGGTGCGTCAACGTCAGAAAAACCAACCAACCGCGGAGCTTTTCATCAAGGAACAAACCATCATACGAGACAGACCGCGCGCGCA 700  
ATATATAGGCGCAGCATGTTGCAGGTCTTTTGGTGTGGTTTGGCGGCTCGGAAAGTAGTTCCTTGTGTTGGTAGTATGCTCTGTCTGCGGCCGCGCGT  
\*\*\*\*\*  
CAACGCGGACGATCCCCGGAGTGCGGATCGATGGCGCGGTGAGCAACGAGACGTTCTCTCCGA 800  
GTGTTGCGCTGCTAGGGGCTCACGCTAGCTACCGCGGCACTCGTTGCTCTGCAAGGAGGGCT  
\*\*\*\*\*

|                    |                                                                                     |                    |                                                                                     |                    |                                                                                      |
|--------------------|-------------------------------------------------------------------------------------|--------------------|-------------------------------------------------------------------------------------|--------------------|--------------------------------------------------------------------------------------|
| TF_motif_seq_0011: |    | TF_motif_seq_0025: |    | TF_motif_seq_0031: |    |
| TF_motif_seq_0068: |    | TF_motif_seq_0103: |    | TF_motif_seq_0121: |    |
| TF_motif_seq_0231: |    | TF_motif_seq_0238: |    | TF_motif_seq_0259: |    |
| TF_motif_seq_0274: |    | TF_motif_seq_0283: |    | TF_motif_seq_0297: |    |
| TF_motif_seq_0310: |   | TF_motif_seq_0321: |   | TF_motif_seq_0333: |   |
| TF_motif_seq_0334: |  | TF_motif_seq_0344: |  | TF_motif_seq_0350: |  |
| TF_motif_seq_0353: |  | TF_motif_seq_0358: |  | TF_motif_seq_0363: |  |
| TF_motif_seq_0372: |  | TF_motif_seq_0378: |  | TF_motif_seq_0380: |  |
| TF_motif_seq_0387: |  | TF_motif_seq_0389: |  | TF_motif_seq_0390: |  |
| TF_motif_seq_0425: |  | TF_motif_seq_0427: |  | TF_motif_seq_0429: |  |
| TF_motif_seq_0440: |  | TF_motif_seq_0458: |  |                    |                                                                                      |

| Factor or Site Name | Loc. (Str.)     | Signal Sequence | SITE #  |
|---------------------|-----------------|-----------------|---------|
| GT1CONSENSUS        | 13 (+) GRWAAW   |                 | S000198 |
| ROOTMOTIFTAPOX1     | 16 (-) ATATT    |                 | S000098 |
| HEXMOTIFTAH3H4      | 20 (-) ACGTCA   |                 | S000053 |
| ASF1MOTIFCAMV       | 20 (+) TGACG    |                 | S000024 |
| TGACGTVMAMY         | 20 (+) TGACGT   |                 | S000377 |
| WRKY71OS            | 20 (+) TGAC     |                 | S000447 |
| ACGTATERD1          | 22 (-) ACGT     |                 | S000415 |
| ACGTABREMOTIFA2OSEM | 22 (+) ACGTGKC  |                 | S000394 |
| ABRELATERD1         | 22 (+) ACGTG    |                 | S000414 |
| ACGTATERD1          | 22 (+) ACGT     |                 | S000415 |
| GADOWNAT            | 22 (+) ACGTGTC  |                 | S000438 |
| BIHD1OS             | 25 (+) TGTCA    |                 | S000498 |
| WRKY71OS            | 26 (-) TGAC     |                 | S000447 |
| GATABOX             | 46 (+) GATA     |                 | S000039 |
| ROOTMOTIFTAPOX1     | 47 (+) ATATT    |                 | S000098 |
| CAATBOX1            | 49 (-) CAAT     |                 | S000028 |
| CCAATBOX1           | 49 (-) CCAAT    |                 | S000030 |
| REALPHALGLHCB21     | 57 (+) AACCAA   |                 | S000362 |
| CCAATBOX1           | 59 (+) CCAAT    |                 | S000030 |
| CAATBOX1            | 60 (+) CAAT     |                 | S000028 |
| ARR1AT              | 61 (-) NGATT    |                 | S000454 |
| SV40COREENHAN       | 66 (+) GTGGWWHG |                 | S000123 |
| BOXLCOREDCPAL       | 73 (-) ACCWWCC  |                 | S000492 |
| MYB1AT              | 76 (-) WAACCA   |                 | S000408 |
| GT1CORE             | 77 (+) GGTAA    |                 | S000125 |
| TAAAGSTKST1         | 80 (+) TAAAG    |                 | S000387 |

|                    |                  |         |
|--------------------|------------------|---------|
| DOFCOREZM          | 81 (+) AAAG      | S000265 |
| GATABOX            | 92 (+) GATA      | S000039 |
| GATABOX            | 94 (-) GATA      | S000039 |
| MYBST1             | 94 (-) GGATA     | S000180 |
| CACTFTPPCA1        | 105 (+) YACT     | S000449 |
| ARR1AT             | 117 (-) NGATT    | S000454 |
| POLASIG1           | 132 (-) AATAAA   | S000080 |
| POLASIG3           | 144 (-) AATAAT   | S000088 |
| TATABOX5           | 145 (+) TTATTT   | S000203 |
| ARR1AT             | 153 (+) NGATT    | S000454 |
| EECCRCAH1          | 154 (+) GANTTNC  | S000494 |
| GT1CONSENSUS       | 155 (-) GRWAAW   | S000198 |
| CGACGOSAMY3        | 160 (+) CGACG    | S000205 |
| CACTFTPPCA1        | 175 (-) YACT     | S000449 |
| ACGTATERD1         | 186 (-) ACGT     | S000415 |
| ACGTATERD1         | 186 (+) ACGT     | S000415 |
| HEXAMERATH4        | 192 (+) CCGTCC   | S000146 |
| CGACGOSAMY3        | 193 (-) CGACG    | S000205 |
| CRTDREHVCBF2       | 194 (-) GTCGAC   | S000411 |
| CBFHV              | 194 (-) RYCGAC   | S000497 |
| CRTDREHVCBF2       | 194 (+) GTCGAC   | S000411 |
| CBFHV              | 194 (+) RYCGAC   | S000497 |
| CAREOSREP1         | 203 (-) CAACTC   | S000421 |
| EECCRCAH1          | 203 (+) GANTTNC  | S000494 |
| WBOXHVIS01         | 217 (+) TGACT    | S000442 |
| WRKY71OS           | 217 (+) TGAC     | S000447 |
| WBOXNTERF3         | 217 (+) TGACY    | S000457 |
| GATABOX            | 235 (+) GATA     | S000039 |
| GT1CONSENSUS       | 235 (+) GRWAAW   | S000198 |
| IBOXCORE           | 235 (+) GATAA    | S000199 |
| ROOTMOTIFTAPOX1    | 238 (-) ATATT    | S000098 |
| ARR1AT             | 245 (+) NGATT    | S000454 |
| DOFCOREZM          | 254 (-) AAAG     | S000265 |
| LTRE1HVBLT49       | 255 (-) CCGAAA   | S000250 |
| MYBPZM             | 274 (-) CCWACC   | S000179 |
| AMMORRESIIUDCRNIA1 | 274 (+) GGWAGGGT | S000374 |
| DPBFCOREDCDC3      | 286 (-) ACACNNG  | S000292 |
| PREATPROD          | 305 (-) ACTCAT   | S000450 |
| CACTFTPPCA1        | 308 (-) YACT     | S000449 |
| RHERPATEXPA7       | 315 (+) KCACGW   | S000512 |
| ABRELATERD1        | 316 (-) ACGTG    | S000414 |
| ACGTATERD1         | 317 (-) ACGT     | S000415 |
| ACGTATERD1         | 317 (+) ACGT     | S000415 |
| GATABOX            | 336 (-) GATA     | S000039 |
| DOFCOREZM          | 357 (+) AAAG     | S000265 |
| REALPHALGLHCB21    | 370 (-) AACCAA   | S000362 |
| MYBPLANT           | 372 (-) MACCWAMC | S000167 |
| MYBPZM             | 372 (-) CCWACC   | S000179 |
| BOXLCOREDCPAL      | 372 (-) ACCWWCC  | S000492 |
| BS1EGCCR           | 383 (+) AGCGGG   | S000352 |
| DPBFCOREDCDC3      | 385 (-) ACACNNG  | S000292 |
| CACTFTPPCA1        | 394 (-) YACT     | S000449 |
| GTGANTG10          | 410 (+) GTGA     | S000378 |
| RAV1AAT            | 420 (-) CAACA    | S000314 |
| GATABOX            | 444 (+) GATA     | S000039 |
| RYREPEATLEGUMINBOX | 459 (-) CATGCAY  | S000100 |
| RYREPEATGMY2       | 459 (-) CATGCAT  | S000105 |
| RYREPEATBNNA       | 460 (-) CATGCA   | S000264 |
| SORLIP2AT          | 471 (-) GGGCC    | S000483 |

|                   |                                  |         |
|-------------------|----------------------------------|---------|
| MYBCORE           | 475 (+) CNGTTR                   | S000176 |
| MYB1LEPR          | 477 (+) GTTAGTT                  | S000443 |
| MYBPLANT          | 487 (+) MACCWAMC                 | S000167 |
| CANBNNAFA         | 490 (+) CNAACAC                  | S000148 |
| CACTFTPPCA1       | 499 (-) YACT                     | S000449 |
| EECCRCAH1         | 512 (+) GANTTNC                  | S000494 |
| REALPHALGLHCB21   | 519 (-) AACCAA                   | S000362 |
| MYBATRD22         | 520 (-) CTAACCA                  | S000175 |
| MYB1AT            | 520 (-) WAACCA                   | S000408 |
| MYB1LEPR          | 522 (+) GTTAGTT                  | S000443 |
| ABRERATCAL        | 536 (+) MACGYGB                  | S000507 |
| CGCGBOXAT         | 537 (-) VCGCGB                   | S000501 |
| CGCGBOXAT         | 537 (+) VCGCGB                   | S000501 |
| EECCRCAH1         | 543 (+) GANTTNC                  | S000494 |
| INTRONLOWER       | 547 (+) TGCAGG                   | S000086 |
| ACGTATERD1        | 577 (-) ACGT                     | S000415 |
| ACGTATERD1        | 577 (+) ACGT                     | S000415 |
| CACTFTPPCA1       | 581 (-) YACT                     | S000449 |
| CAATBOX1          | 589 (+) CAAT                     | S000028 |
| NODCON2GM         | 596 (+) CTCCTT                   | S000462 |
| OSE2ROOTNODULE    | 596 (+) CTCCTT                   | S000468 |
| GATABOX           | 613 (-) GATA                     | S000039 |
| MYBST1            | 613 (-) GGATA                    | S000180 |
| REBETALGLHCB21    | 613 (-) CGGATA                   | S000363 |
| CGCGBOXAT         | 616 (-) VCGCGB                   | S000501 |
| ABRERATCAL        | 616 (-) MACGYGB                  | S000507 |
| CGCGBOXAT         | 616 (+) VCGCGB                   | S000501 |
| CURECORECR        | 624 (-) GTAC                     | S000493 |
| CURECORECR        | 624 (+) GTAC                     | S000493 |
| ACGTATERD1        | 629 (-) ACGT                     | S000415 |
| ACGTATERD1        | 629 (+) ACGT                     | S000415 |
| SEF3MOTIFGM       | 646 (+) AACCCA                   | S000115 |
| MYBCOREATCYCB1    | 652 (+) AACGG                    | S000502 |
| DOFCOREZM         | 663 (-) AAAG                     | S000265 |
| AACACOREOSGLUB1   | 675 (+) AACAAAC                  | S000353 |
| MYB1AT            | 678 (+) WAACCA                   | S000408 |
| SORLIP4AT         | 681 (-) GTATGATGG                | S000485 |
| ARFAT             | 690 (-) TGTCTC                   | S000270 |
| SEBFCONSSTPR10A   | 690 (-) YTGTCWC                  | S000391 |
| SURECOREATSULTR11 | 690 (+) GAGAC                    | S000499 |
| PRECONSCRHSP70A   | 706 (+) SCGAYNRNNNNNNNNNNNNNNHHD | S000506 |
| CACTFTPPCA1       | 731 (-) YACT                     | S000449 |
| //                |                                  |         |

#### >TaF3h-B2

ATTTGCAACCGAGCGAGCTTAGATGGTTAGATATTTCTTGTGGTGGAAGTAGCCCATCATGGTTTCATAGTCCTAAGGCCTT  
 ATTTGGTTTGGAGGAATTTTCATAGGACTTTTATACGATAGGATTCTTATAGGAAATTTTCTTAAAGCCTATTAATTCATA  
 GGAATGAATTTTTATTCTACATAGAATTGGTTCCTATCCTTCACACTTTAAAGTAAATATGAATCTAGACTCACT  
 GGAAAAAATCATATTATGTGAAACTCATAGGATTTGAGAGACTTGTCTATCTCATTTCCTACAAGTTTCTATTTCTATGA  
 TAATGGTATATCGTATGAACCAAAGAAGCCTAATTTGACACTCGTGCATGCATTTTCTGAATTTATTTTCAGACTTTCTG  
 GTGATGTTTCATTTCAGTGCGAGACATCTCCCTAATTTAAAGATGTTGTGCCGTTTCAGTATTTCAAAGGTACTCAGGCGTTC  
 ATAGGCATCTCCCTAATTTAAATATATGTACCCTCCTTTCCATCTATAATCATACGAGACAGACGTACAGATCGATAACTG  
 GTAGATAGCG



ATTTGCAACCGAGCGAGCTTAGATGGTTAGATATTTCTTGTTGGTGAAGCTAGCCCATCATGGTTCATAGTCCTAAGGCCTTATTTGGTTGGAGGAATTT  
 TAAACGTGGCTCGCTCGAATCTACCAATCTATAAAGAACCACCTTGTATCGGGTAGTACCAAGTATCAGGATTCGGGAATAAACCAACCTCCTTAAA  
 CATAGGACTTTTATACGATAGGATCTTATAGGAAATTTTCTTAAAGCCTATTAATTCATAGGAATGAATTTTATTCCTACATAGAATTGGTTCCTAT  
 GTATCCTGAAATATGCTATCTTAAGAAATATCTTTAAAAAGAATTCGATAAATTAAATATCTTACCTTAAATAAAGGATGTATCTTAAACCAAGGATA  
 CCTTCACACTTTAAAGTAAATAAATATGAATCTAGACTCACTGGAAAAAATCATATTAATGTGAAACTCATAGGATTTGAGAGACTTGTCTCTCATTT  
 GGAAGTGTGAAATTTCTATTTTATTTATCTTAGATCTGAGTGACCTTTTCTTAGTATAATACACTTTGAGTATCTCTAAACCTCTGAACAGTAGAGTAAA  
 CCTACAAGTTTCTATTTCTATGATAATGGTATATCGTATGAACCAAAAGAAGCCTAATTTGACACTCGTGCATGCATTTTCTGAATTTATTTAGACT  
 GGATGTTCAAAAGATAAGATACTATTACCATATAGCATACTGGTTTCTTCGGATTAACACTGTGAGCACGTACGTAAAAAGACTTAAATAAAGTCTGA  
 TTCTGGTGATGTTCAATTCAGTGCGAGACATCTCCCTAATTTAAAGATGTTGTGCGGGTTCAGTATTTCAAAGGTACTCAGGCCTCATAGGCATCTCCCT  
 AAGACCATAACAAGTAAAGTACAGCTCTGTAGAGGGATTAAATTTCTACAACACGGCCAAGTCATAAAGTTTCCATGAGTCCGCAACTATCCCTAGAGGGA  
 AATTTAAATAATGTATGACCTCCTTTCCATCTATAATCATACGAGACAGAGCTACAGATCGATAACTGGTAGATAGCG  
 TTAATTTATATACATGGAGGAAAGGTAGATATTAGTATGCTCTGTCTGCATGTCTAGCTATTGACCATCTATCGC

TF\_motif\_seq\_0246:  TF\_motif\_seq\_0256:  TF\_motif\_seq\_0257:   
 TF\_motif\_seq\_0266:  TF\_motif\_seq\_0282:  TF\_motif\_seq\_0316:   
 TF\_motif\_seq\_0327:  TF\_motif\_seq\_0335:  TF\_motif\_seq\_0347:   
 TF\_motif\_seq\_0386:  TF\_motif\_seq\_0422:  TF\_motif\_seq\_0508:   
 TF\_motif\_seq\_0002:  TF\_motif\_seq\_0031:  TF\_motif\_seq\_0192:   
 TF\_motif\_seq\_0238:  TF\_motif\_seq\_0259:  TF\_motif\_seq\_0274:   
 TF\_motif\_seq\_0082:  TF\_motif\_seq\_0321:  TF\_motif\_seq\_0334:   
 TF\_motif\_seq\_0350:  TF\_motif\_seq\_0372:  TF\_motif\_seq\_0380:   
 TF\_motif\_seq\_0387:  TF\_motif\_seq\_0389:  TF\_motif\_seq\_0390:   
 TF\_motif\_seq\_0391:  TF\_motif\_seq\_0392:  TF\_motif\_seq\_0397: 

| Factor or Site Name | Loc. (Str.)      | Signal Sequence | SITE #  |
|---------------------|------------------|-----------------|---------|
| MYBCORE             | 6 (-) CNGTTR     |                 | S000176 |
| MYBATRD22           | 24 (-) CTAACCA   |                 | S000175 |
| MYB1AT              | 24 (-) WAACCA    |                 | S000408 |
| GATABOX             | 30 (+) GATA      |                 | S000039 |
| ROOTMOTIFTAPOX1     | 31 (+) ATATT     |                 | S000098 |
| POLLEN1LELAT52      | 34 (-) AGAAA     |                 | S000245 |
| SITEIIATCYTC        | 51 (-) TGGGCY    |                 | S000474 |
| CARGATCONSENSUS     | 79 (-) CCWWWWWGG |                 | S000404 |
| CARGATCONSENSUS     | 79 (+) CCWWWWWGG |                 | S000404 |
| TATABOX5            | 81 (+) TTATTT    |                 | S000203 |
| REALPHALGLHCB21     | 85 (-) AACCAA    |                 | S000362 |
| MYB1AT              | 86 (-) WAACCA    |                 | S000408 |
| EECCRAH1            | 96 (+) GANTTNC   |                 | S000494 |
| DOFCOREZM           | 109 (-) AAAG     |                 | S000265 |
| GATABOX             | 118 (+) GATA     |                 | S000039 |
| ARR1AT              | 122 (+) NGATT    |                 | S000454 |
| GT1CONSENSUS        | 133 (+) GRWAAW   |                 | S000198 |
| TAAAGSTKST1         | 146 (+) TAAAG    |                 | S000387 |
| DOFCOREZM           | 147 (+) AAAG     |                 | S000265 |
| TATABOX3            | 153 (+) TATTAAT  |                 | S000110 |
| INRNTPSADB          | 165 (-) YTCANTYY |                 | S000395 |
| SEF4MOTIFGM7S       | 172 (+) RTTTTTTR |                 | S000103 |
| POLASIG1            | 175 (-) AATAAA   |                 | S000080 |
| BOXIINTPATPB        | 186 (+) ATAGAA   |                 | S000296 |
| CAATBOX1            | 191 (-) CAAT     |                 | S000028 |
| CCAATBOX1           | 191 (-) CCAAT    |                 | S000030 |
| REALPHALGLHCB21     | 192 (-) AACCAA   |                 | S000362 |
| GATABOX             | 200 (-) GATA     |                 | S000039 |
| MYBST1              | 200 (-) GGATA    |                 | S000180 |
| GTGANTG10           | 206 (-) GTGA     |                 | S000378 |
| CACTFTPPCA1         | 209 (+) YACT     |                 | S000449 |
| NTBBF1ARROLB        | 215 (-) ACTTTA   |                 | S000273 |
| TAAAGSTKST1         | 215 (+) TAAAG    |                 | S000387 |
| DOFCOREZM           | 216 (+) AAAG     |                 | S000265 |
| CACTFTPPCA1         | 218 (-) YACT     |                 | S000449 |

|                     |                |                |                |
|---------------------|----------------|----------------|----------------|
| TATABOX5            | 222 (-)        | TTATTT         | S000203        |
| SEF1MOTIF           | 223 (-)        | ATATTAWW       | S000006        |
| POLASIG1            | 223 (+)        | AATAAA         | S000080        |
| ROOTMOTIFTAPOX1     | 227 (-)        | ATATT          | S000098        |
| ARR1AT              | 233 (-)        | NGATT          | S000454        |
| GTGANTG10           | 242 (-)        | GTGA           | S000378        |
| CACTFTPPCA1         | 243 (+)        | YACT           | S000449        |
| PYRIMIDINEBOXHVEPB1 | 247 (-)        | TTTTTTCC       | S000298        |
| GT1CONSENSUS        | 247 (+)        | GRWAAW         | S000198        |
| GT1CONSENSUS        | 248 (+)        | GRWAAW         | S000198        |
| GT1GMSCAM4          | 248 (+)        | GAAAAA         | S000453        |
| ARR1AT              | 254 (-)        | NGATT          | S000454        |
| ROOTMOTIFTAPOX1     | 258 (+)        | ATATT          | S000098        |
| GTGANTG10           | 265 (+)        | GTGA           | S000378        |
| EECCRCAH1           | 267 (-)        | GANTTNC        | S000494        |
| PREATPROD           | 270 (+)        | ACTCAT         | S000450        |
| ARR1AT              | 277 (+)        | NGATT          | S000454        |
| SURECOREATSULTR11   | 286 (+)        | GAGAC          | S000499        |
| BIHD1OS             | 292 (+)        | TGTCA          | S000498        |
| WRKY71OS            | 293 (-)        | TGAC           | S000447        |
| INRNTPSADB          | 298 (+)        | YTCANTYY       | S000395        |
| GT1CONSENSUS        | 301 (-)        | GRWAAW         | S000198        |
| SURE1STPAT21        | 313 (-)        | AATAGAAAA      | S000186        |
| POLLEN1LELAT52      | 314 (-)        | AGAAA          | S000245        |
| BOXIINTPATPB        | 315 (-)        | ATAGAA         | S000296        |
| POLLEN1LELAT52      | 320 (-)        | AGAAA          | S000245        |
| BOXIINTPATPB        | 321 (-)        | ATAGAA         | S000296        |
| GATABOX             | 327 (+)        | GATA           | S000039        |
| GT1CONSENSUS        | 327 (+)        | GRWAAW         | S000198        |
| IBOXCORE            | 327 (+)        | GATAA          | S000199        |
| S1FBOXSORPS1L21     | 331 (+)        | ATGGTA         | S000223        |
| GATABOX             | <b>337 (-)</b> | <b>GATA</b>    | <b>S000039</b> |
| REALPHALGLHCB21     | <b>346 (+)</b> | <b>AACCAA</b>  | <b>S000362</b> |
| DOFCOREZM           | 351 (+)        | AAAG           | S000265        |
| WBOXATNPR1          | 365 (+)        | TTGAC          | S000390        |
| BIHD1OS             | 366 (-)        | TGTCA          | S000498        |
| WRKY71OS            | 366 (+)        | TGAC           | S000447        |
| DPBFCORECDC3        | <b>368 (+)</b> | <b>ACACNNG</b> | <b>S000292</b> |
| CACTFTPPCA1         | 369 (+)        | YACT           | S000449        |
| RHERPATEXPA7        | <b>372 (-)</b> | <b>KCACGW</b>  | <b>S000512</b> |
| RYREPEATLEGUMINBOX  | 374 (-)        | CATGCAY        | S000100        |
| RYREPEATBNNAPA      | 375 (-)        | CATGCA         | S000264        |
| RYREPEATLEGUMINBOX  | 377 (+)        | CATGCAY        | S000100        |
| RYREPEATGMGY2       | 377 (+)        | CATGCAT        | S000105        |
| RYREPEATBNNAPA      | 377 (+)        | CATGCA         | S000264        |
| GT1CONSENSUS        | 383 (-)        | GRWAAW         | S000198        |
| GT1GMSCAM4          | 383 (-)        | GAAAAA         | S000453        |
| POLLEN1LELAT52      | 385 (-)        | AGAAA          | S000245        |
| POLASIG1            | 393 (-)        | AATAAA         | S000080        |
| TATABOX5            | 394 (+)        | TTATTT         | S000203        |
| EECCRCAH1           | 402 (+)        | GANTTNC        | S000494        |
| DOFCOREZM           | 404 (-)        | AAAG           | S000265        |
| POLLEN1LELAT52      | 405 (-)        | AGAAA          | S000245        |
| GTGANTG10           | 411 (+)        | GTGA           | S000378        |
| ARFAT               | 430 (-)        | TGTCTC         | S000270        |
| SURECOREATSULTR11   | 430 (+)        | GAGAC          | S000499        |
| TAAAGSTKST1         | 447 (+)        | TAAAG          | S000387        |
| DOFCOREZM           | 448 (+)        | AAAG           | S000265        |



|                   |                         |                |
|-------------------|-------------------------|----------------|
| NODCON1GM         | 448 (+) AAAGAT          | S000461        |
| OSE1ROOTNODULE    | 448 (+) AAAGAT          | S000467        |
| RAV1AAT           | 453 (-) CAACA           | S000314        |
| CACTFTPPCA1       | 467 (-) YACT            | S000449        |
| ERELEE4           | <b>470 (+) AWTTCAAA</b> | <b>S000037</b> |
| DOFCOREZM         | 475 (+) AAAG            | S000265        |
| CURECORECR        | <b>479 (-) GTAC</b>     | <b>S000493</b> |
| CURECORECR        | <b>479 (+) GTAC</b>     | <b>S000493</b> |
| CACTFTPPCA1       | 480 (+) YACT            | S000449        |
| SEF1MOTIF         | 510 (-) ATATTTAWW       | S000006        |
| TATABOXOSPAL      | 511 (-) TATTTAA         | S000400        |
| ROOTMOTIFTAPOX1   | 514 (-) ATATT           | S000098        |
| CURECORECR        | 521 (-) GTAC            | S000493        |
| CURECORECR        | 521 (+) GTAC            | S000493        |
| DOFCOREZM         | 529 (-) AAAG            | S000265        |
| ARR1AT            | 541 (-) NGATT           | S000454        |
| ARFAT             | 549 (-) TGTCTC          | S000270        |
| SEBFCONSSTPR10A   | 549 (-) YTGTCWC         | S000391        |
| SURECOREATSULTR11 | 549 (+) GAGAC           | S000499        |
| ACGTATERD1        | 556 (-) ACGT            | S000415        |
| ACGTATERD1        | 556 (+) ACGT            | S000415        |
| CURECORECR        | 558 (-) GTAC            | S000493        |
| CURECORECR        | 558 (+) GTAC            | S000493        |
| MYBCORE           | 570 (-) CNGTTR          | S000176        |
| MYB2AT            | 570 (+) TAACTG          | S000177        |
| MYB2CONSENSUSAT   | 570 (+) YAACKG          | S000409        |
| GATABOX           | 579 (+) GATA            | S000039        |
| //                |                         |                |
